# Supplementary material for: Predicting Proteolysis in Complex Proteomes Using Deep Learning
Source: MDPI journal article supplement (doi:10.3390/ijms22063071), 2021-03-17

# MMP1 model performance against 15% test data

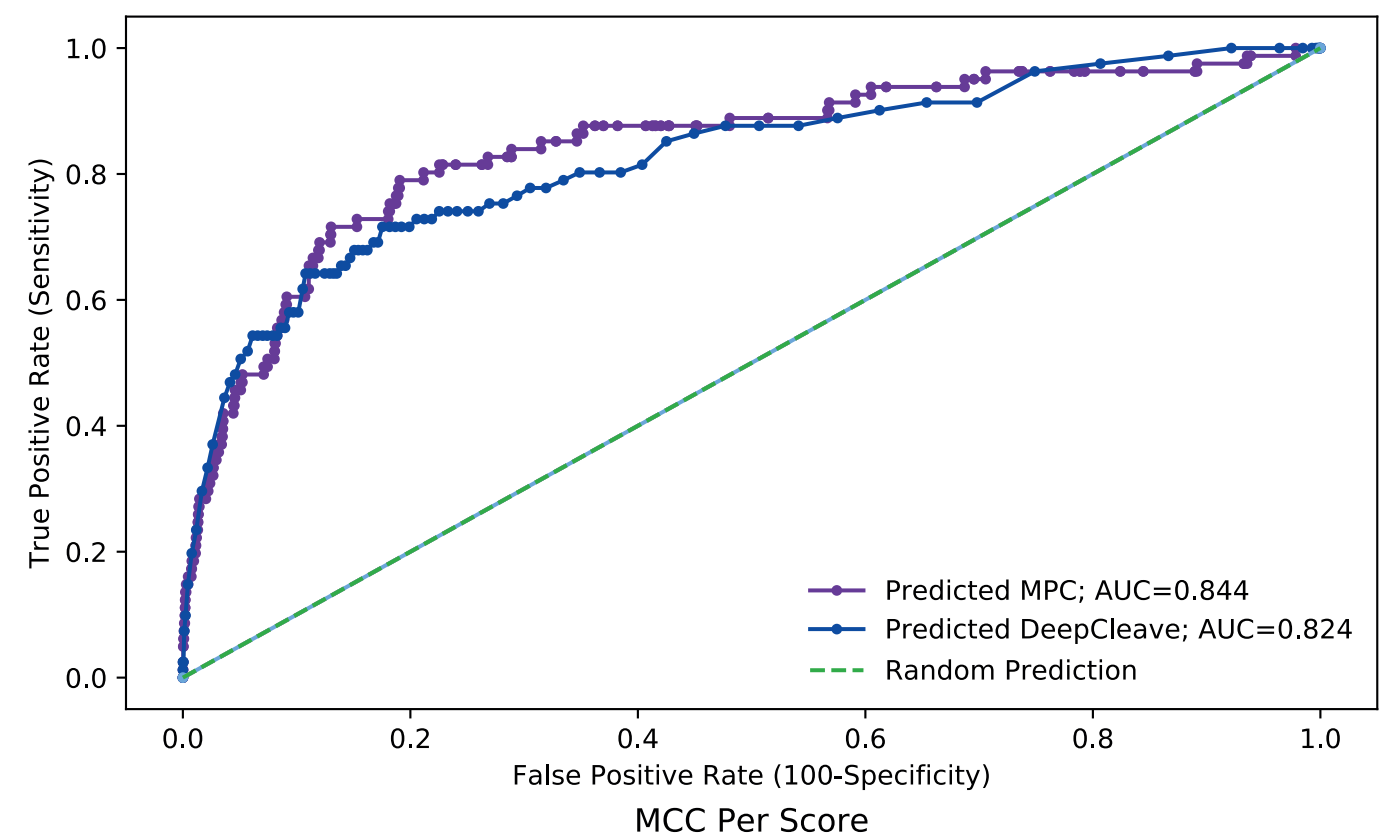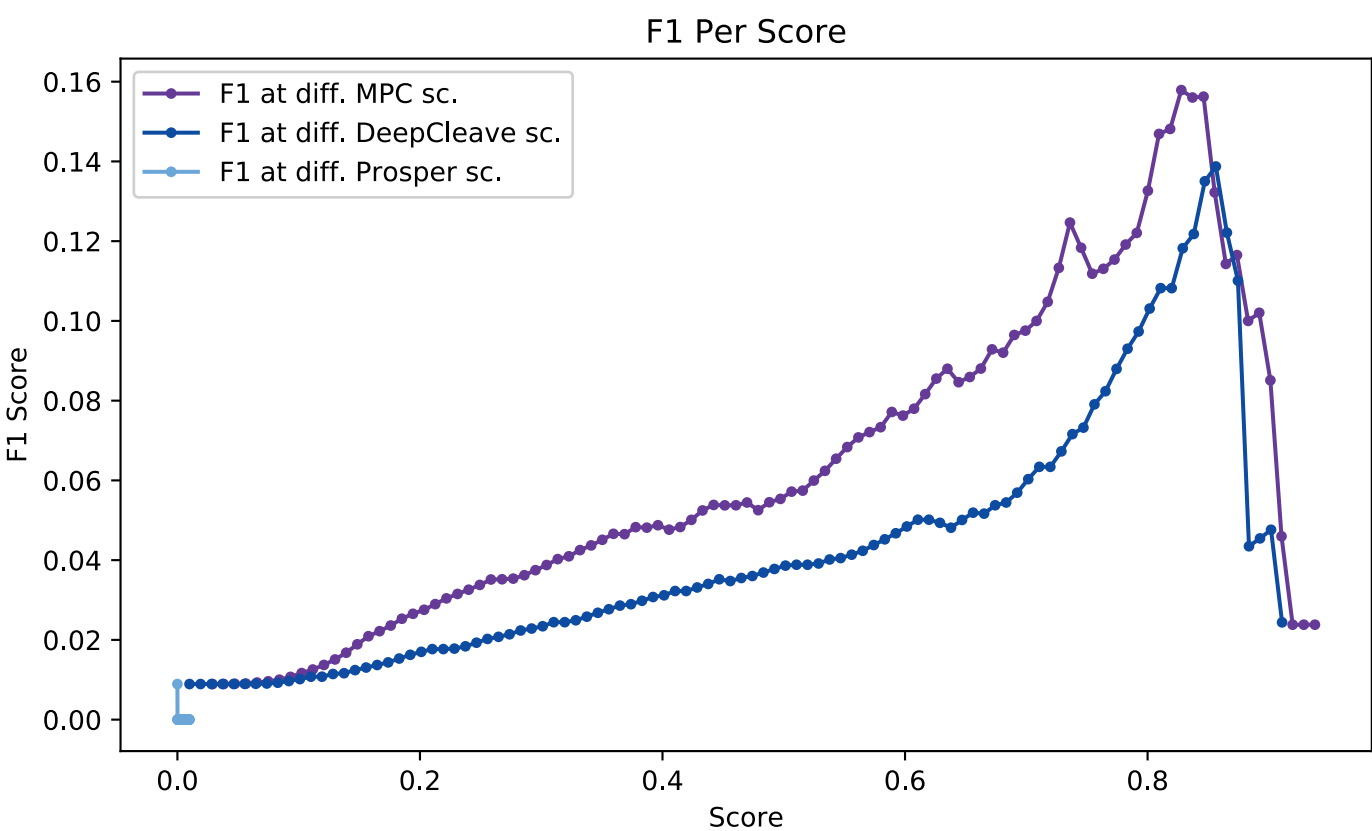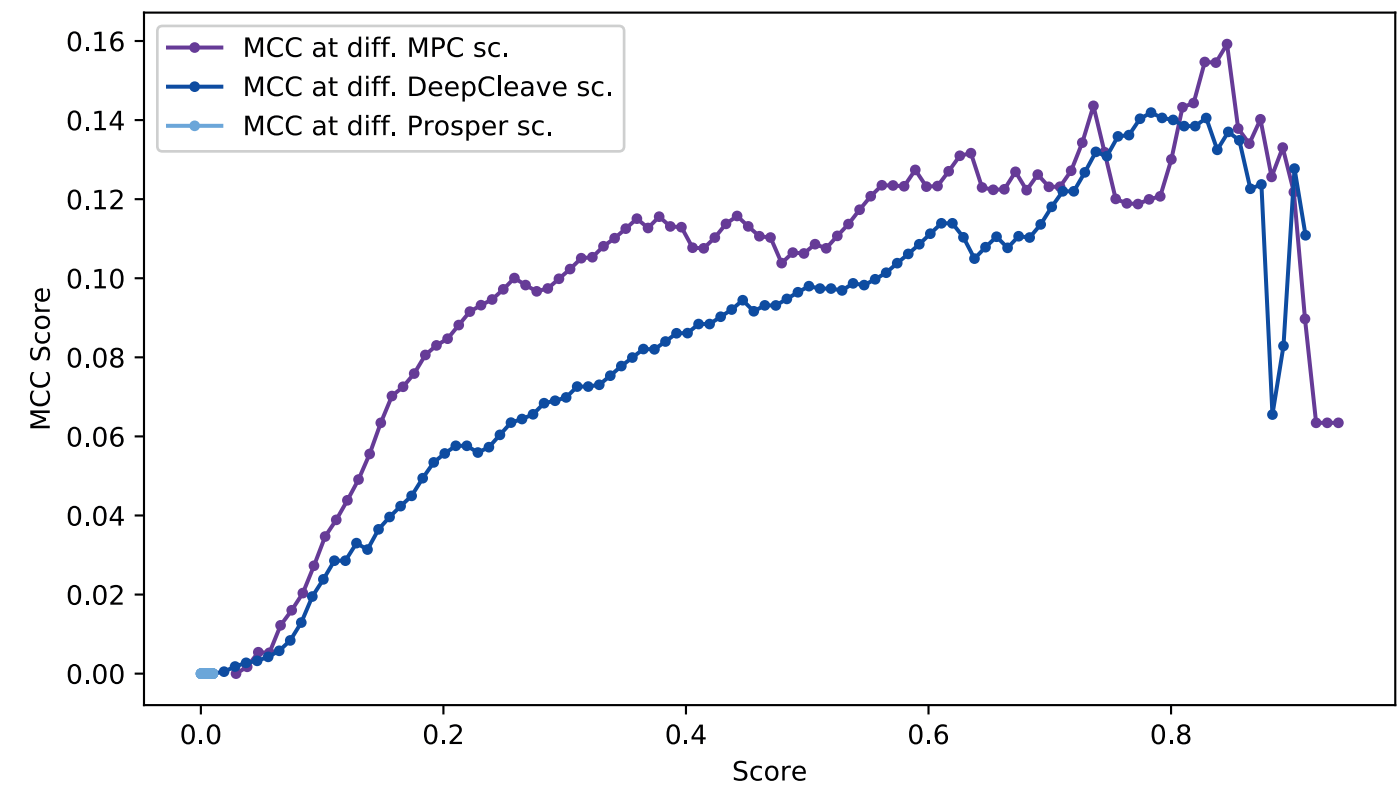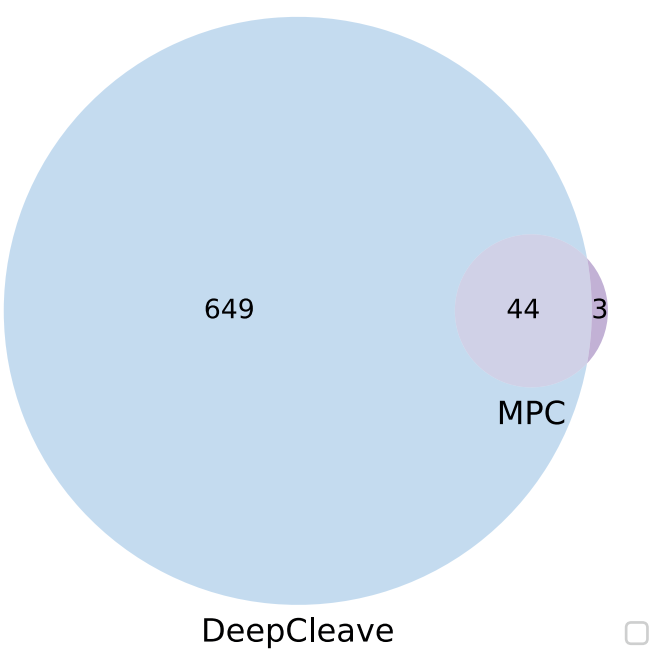

# MMP2 model performance against 15% test data

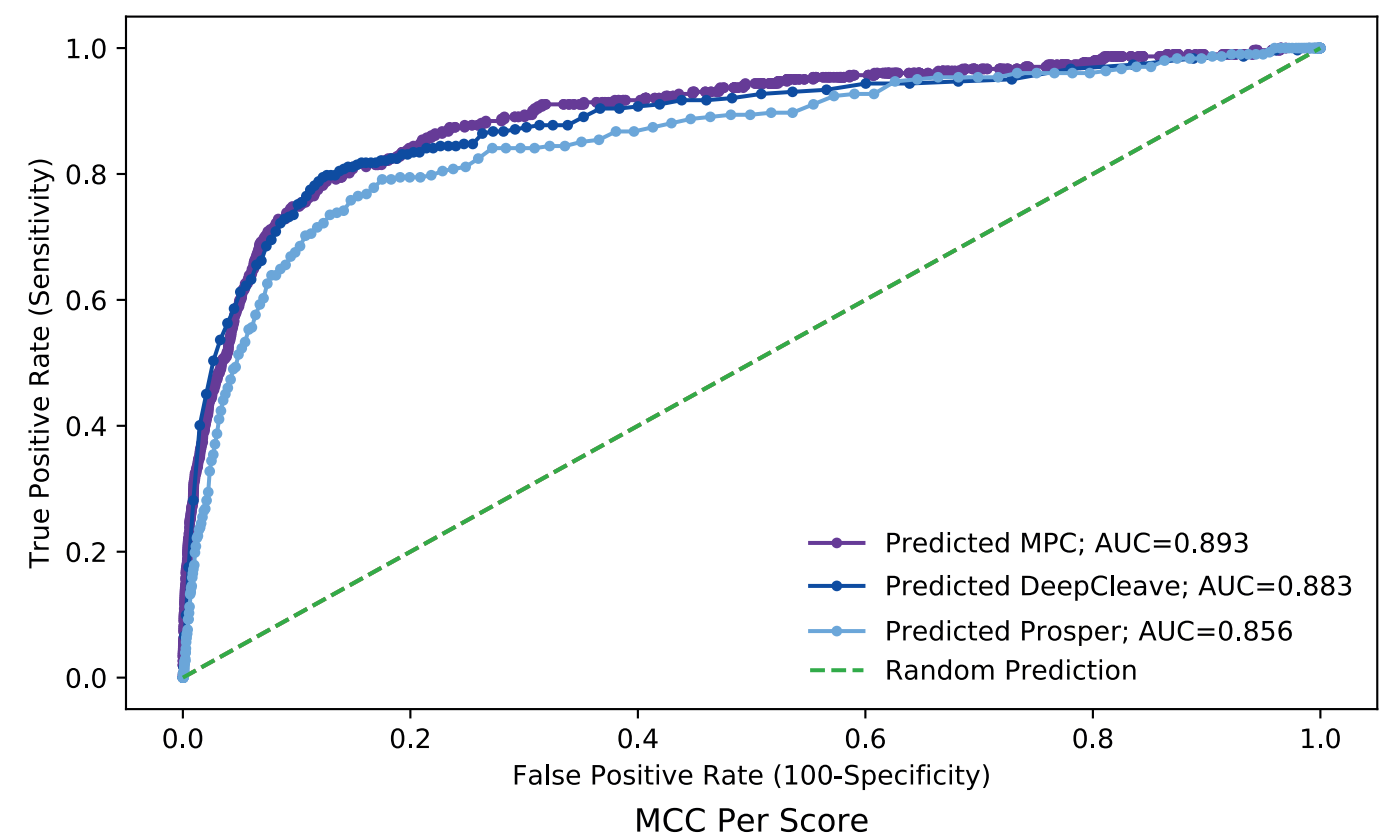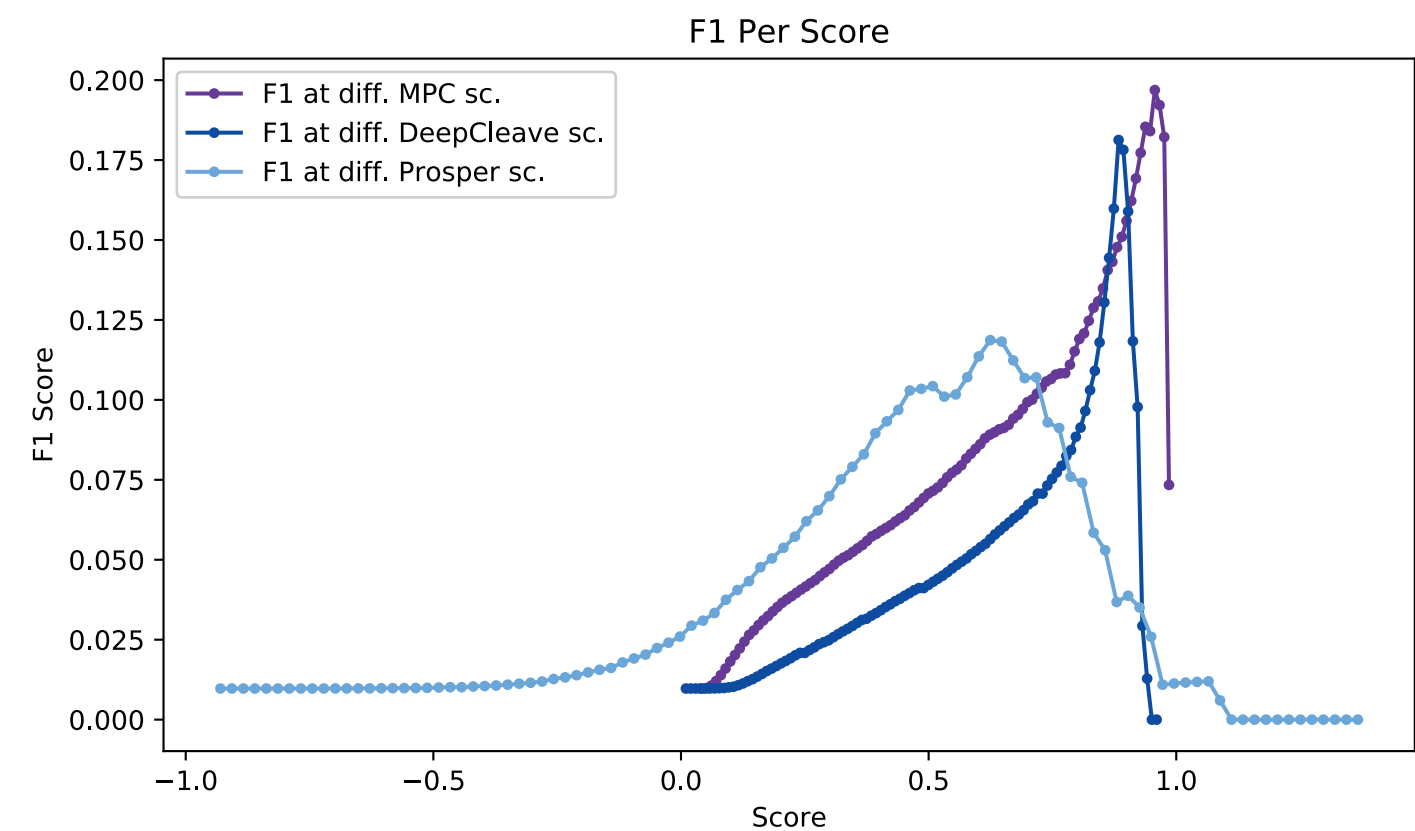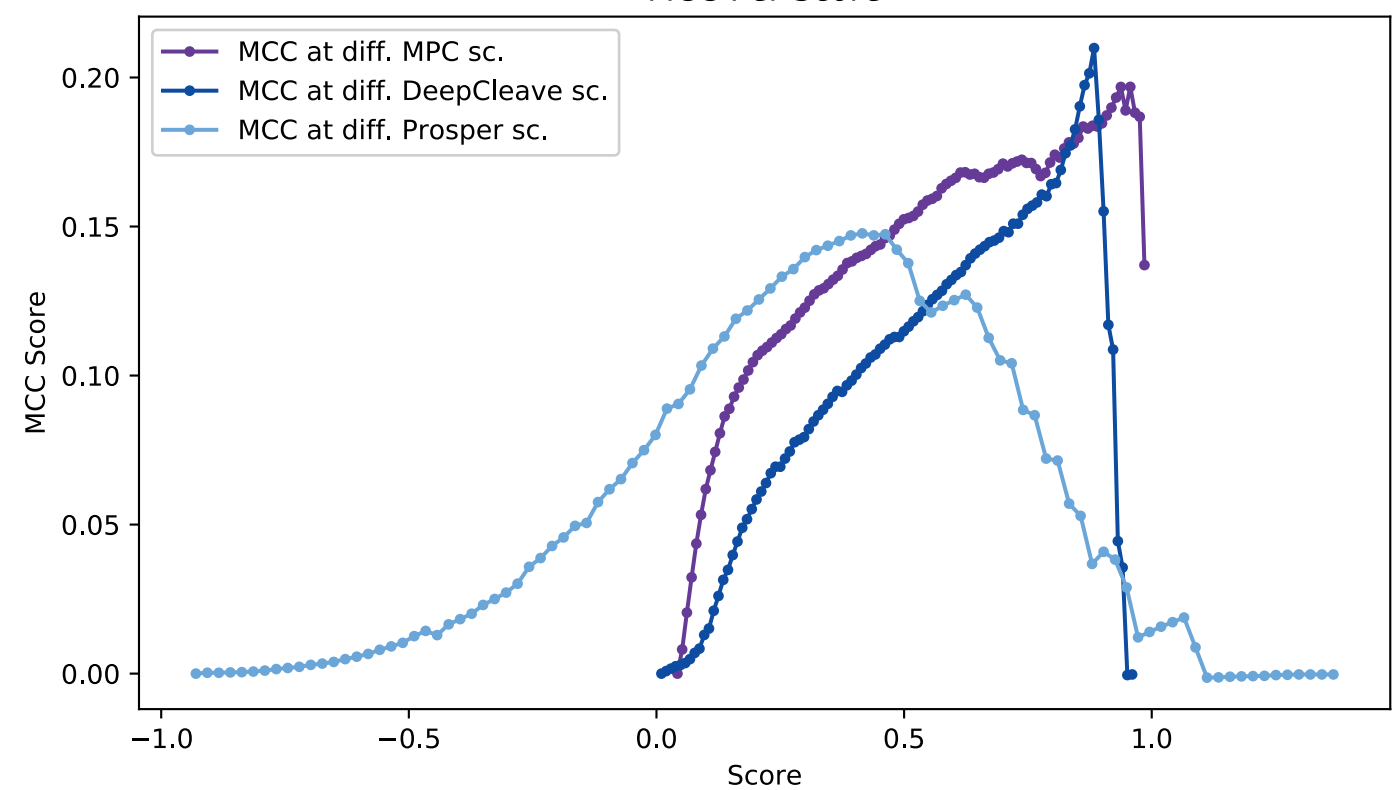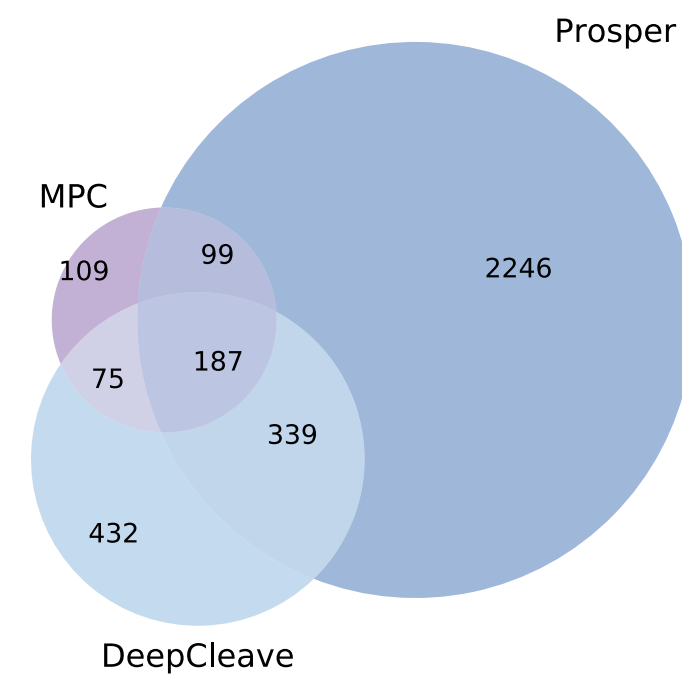

# MMP3 model performance against 15% test data

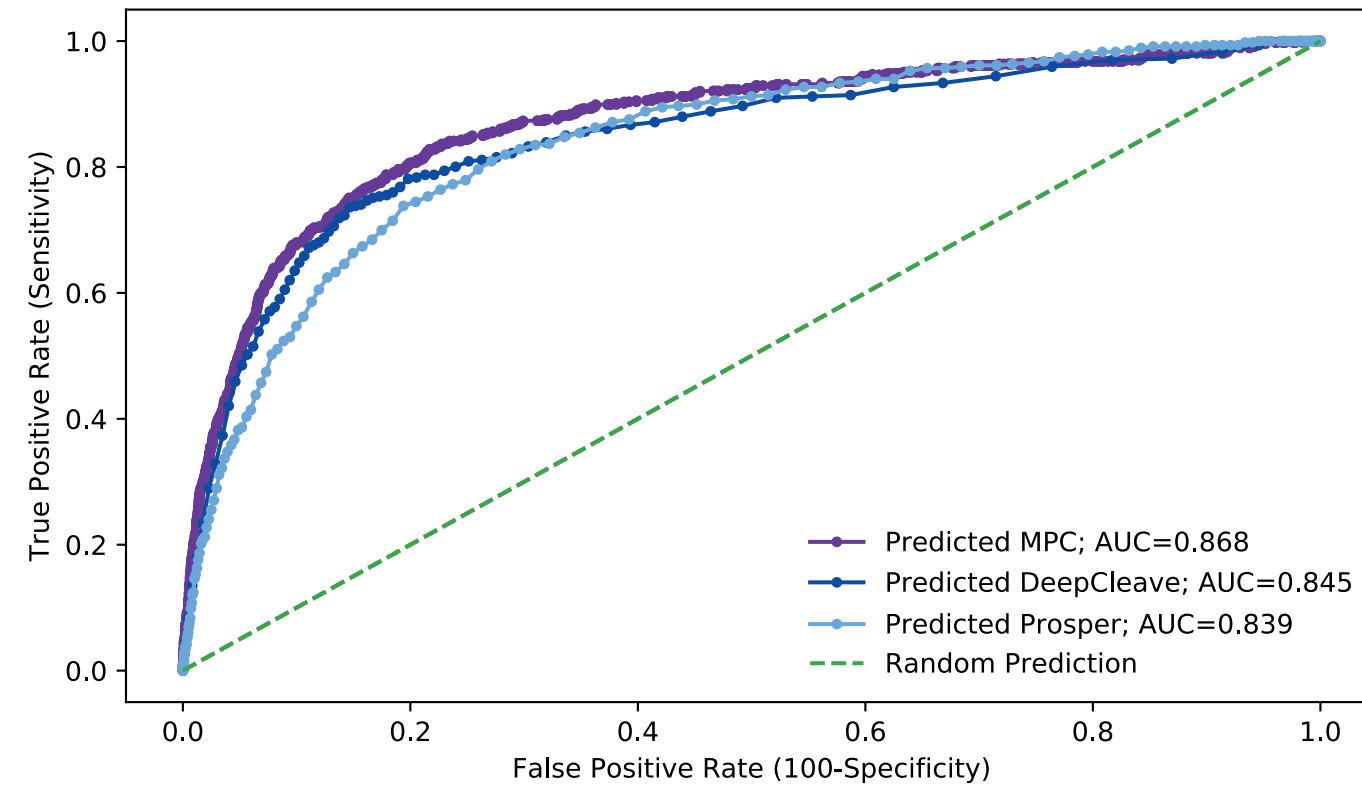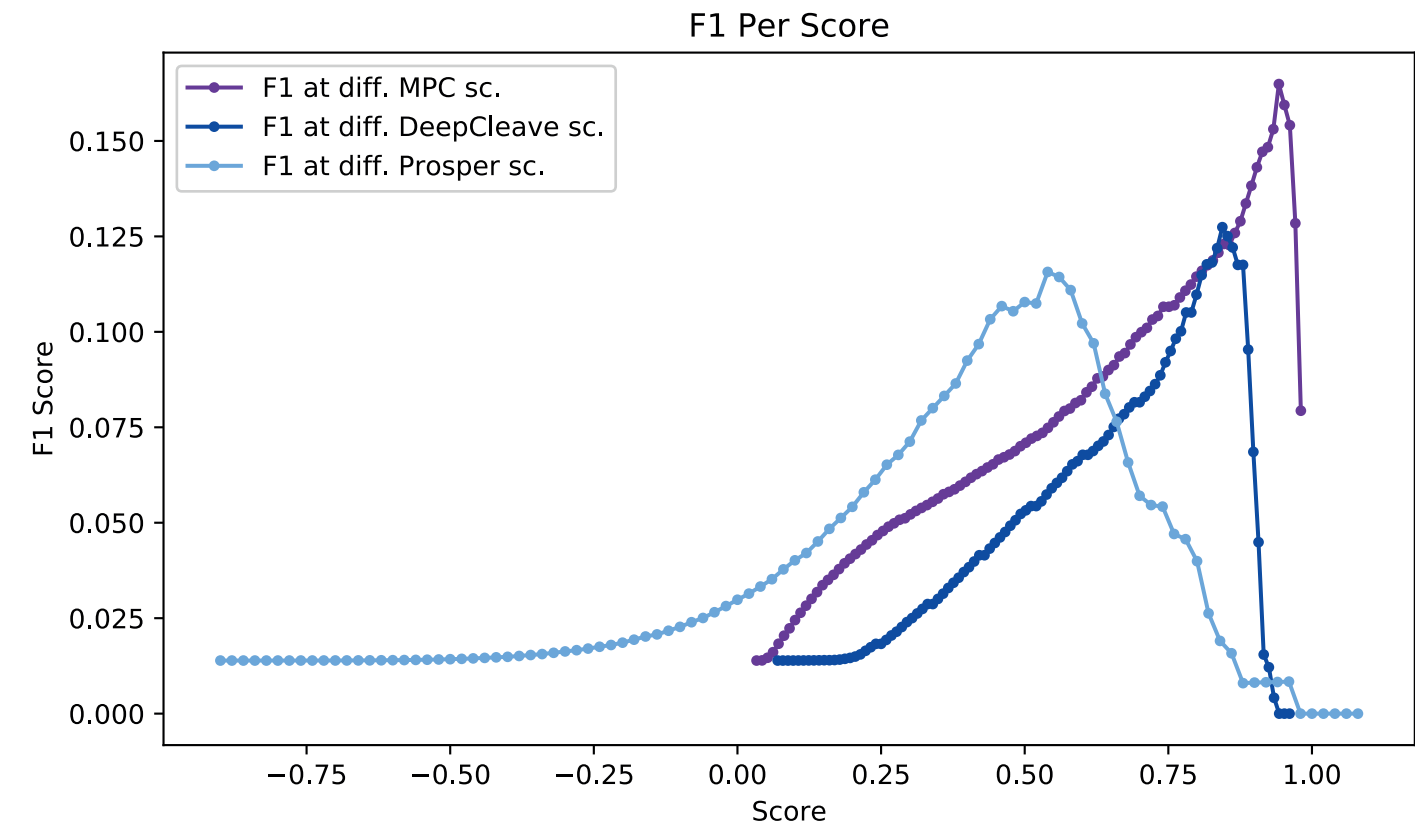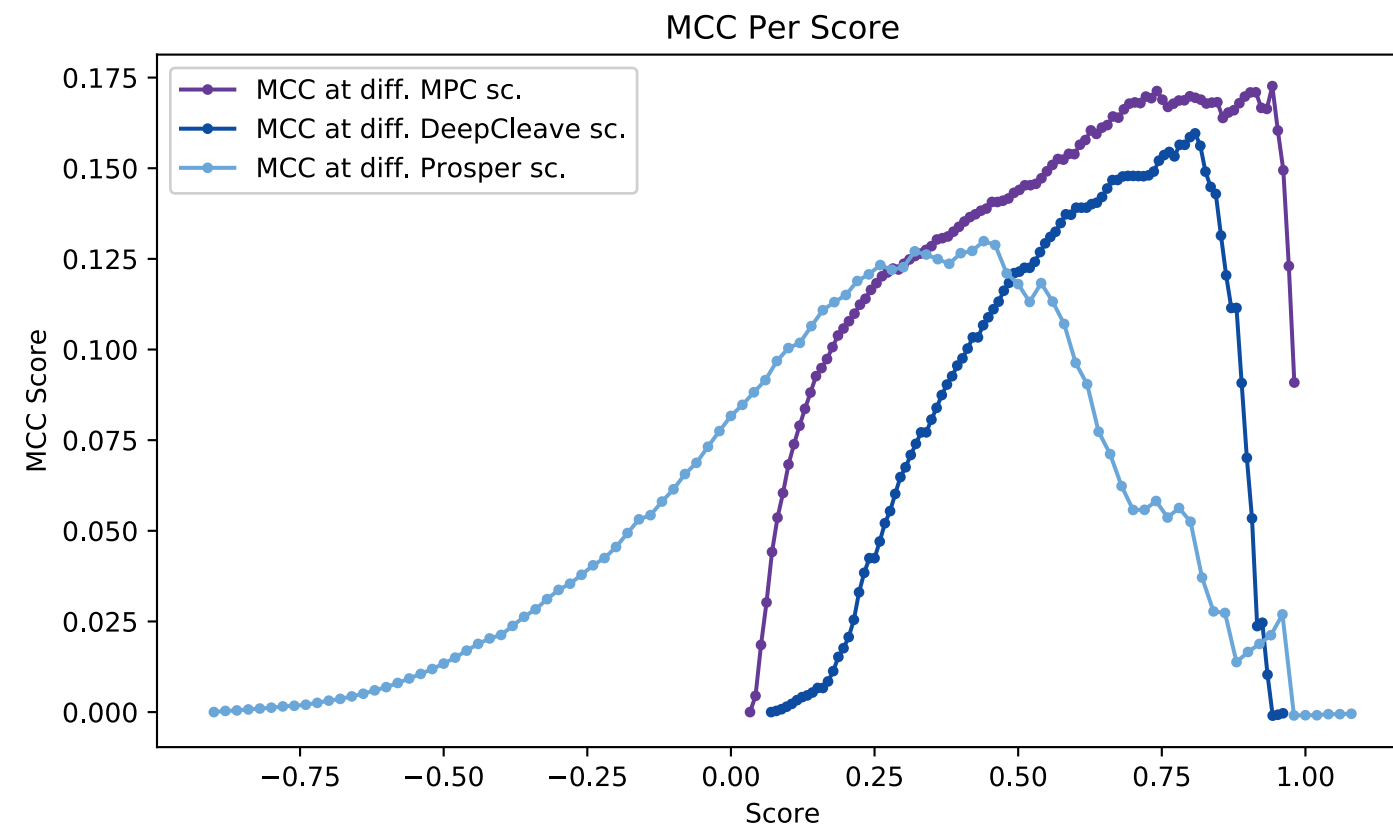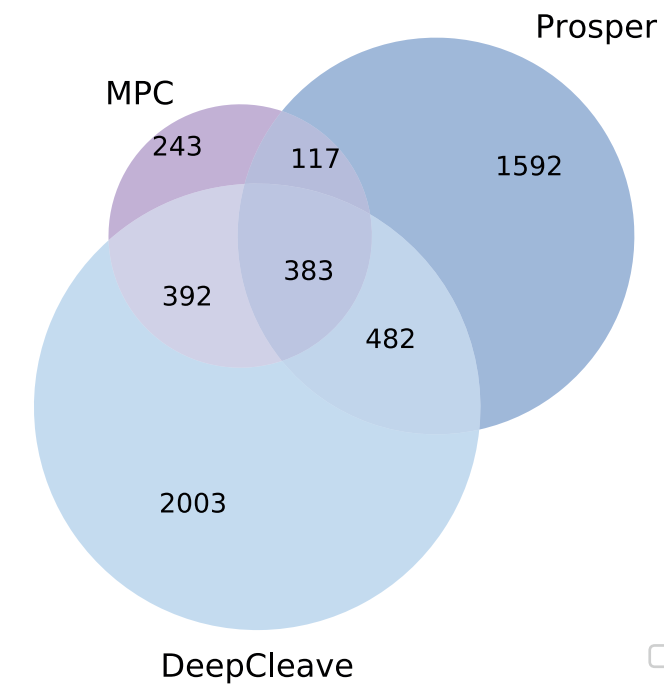

# MMP7 model performance against 15% test data

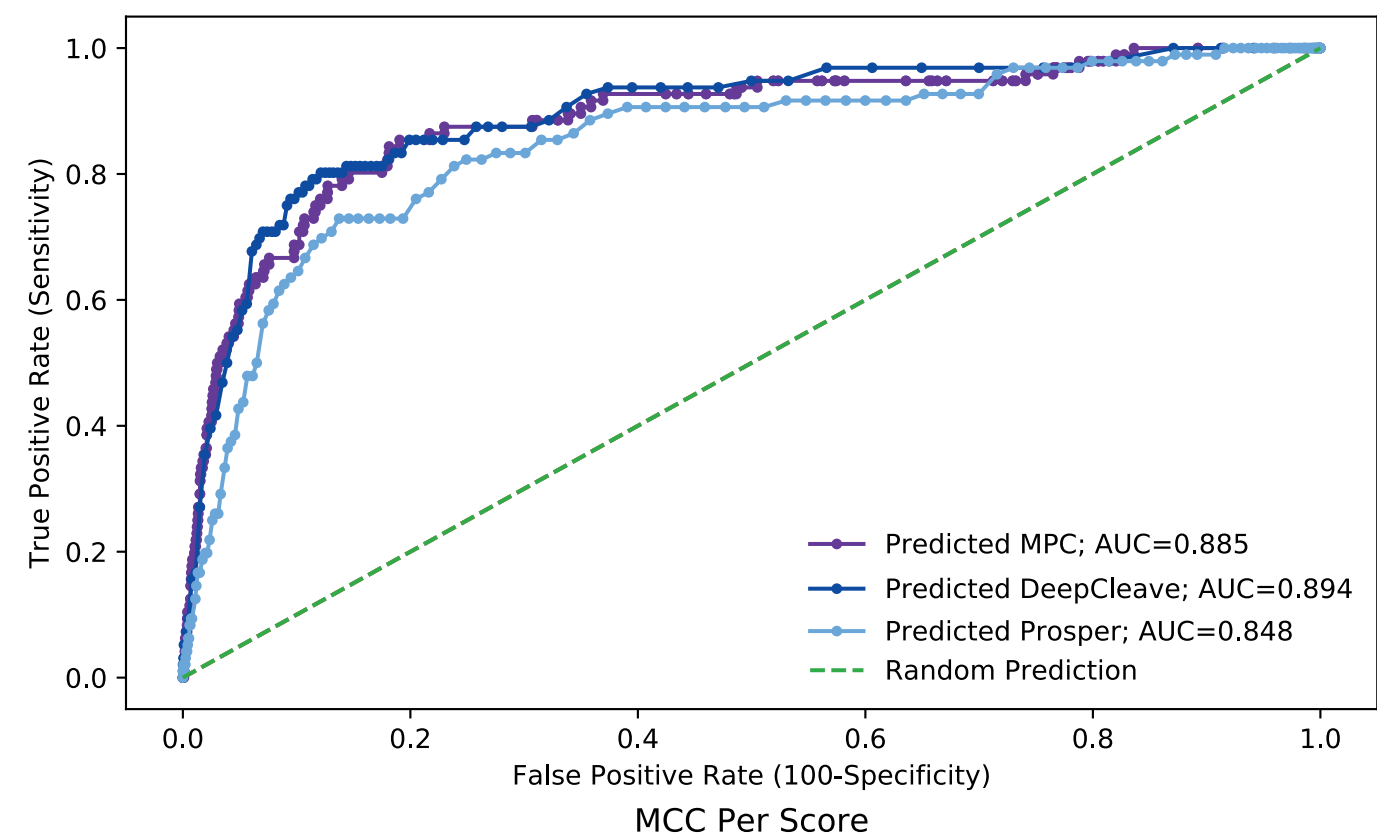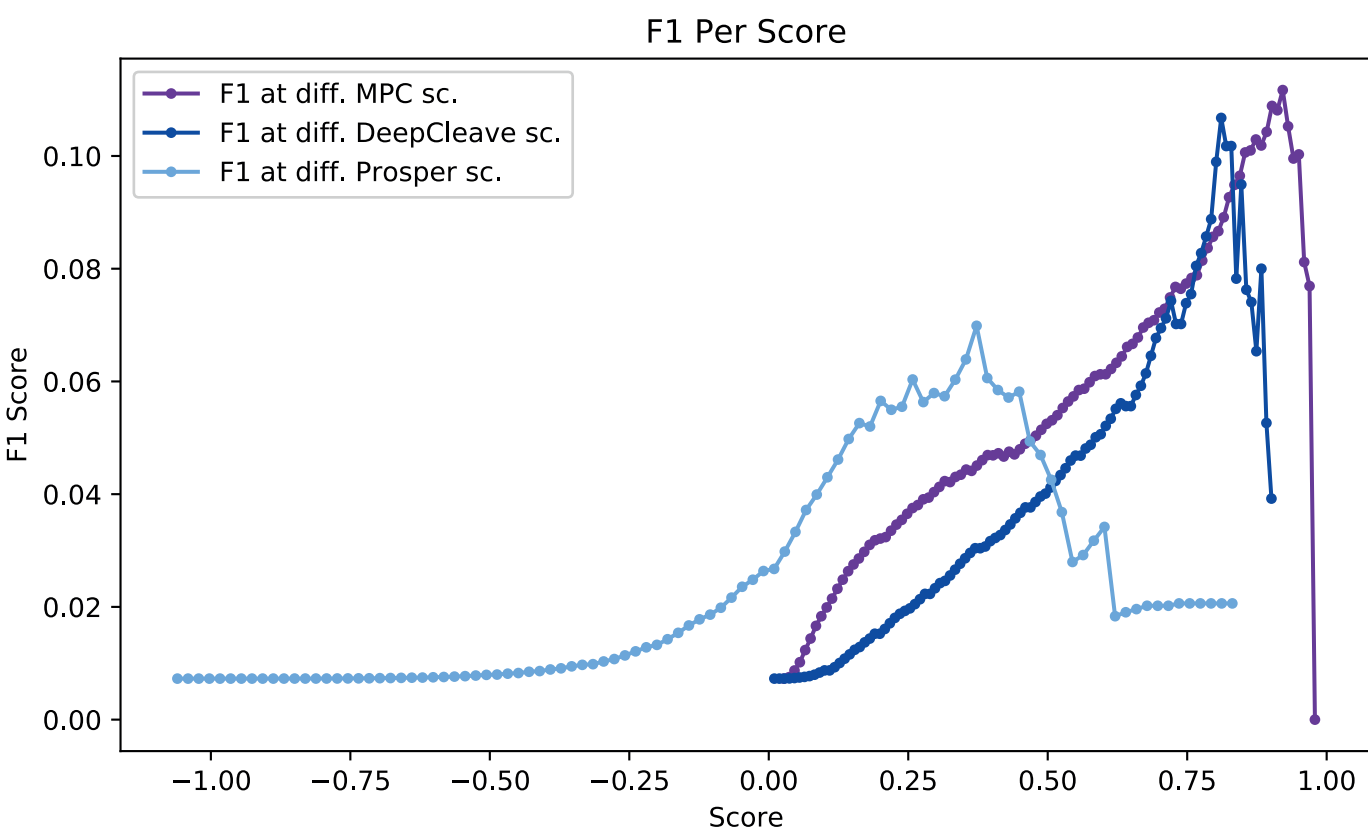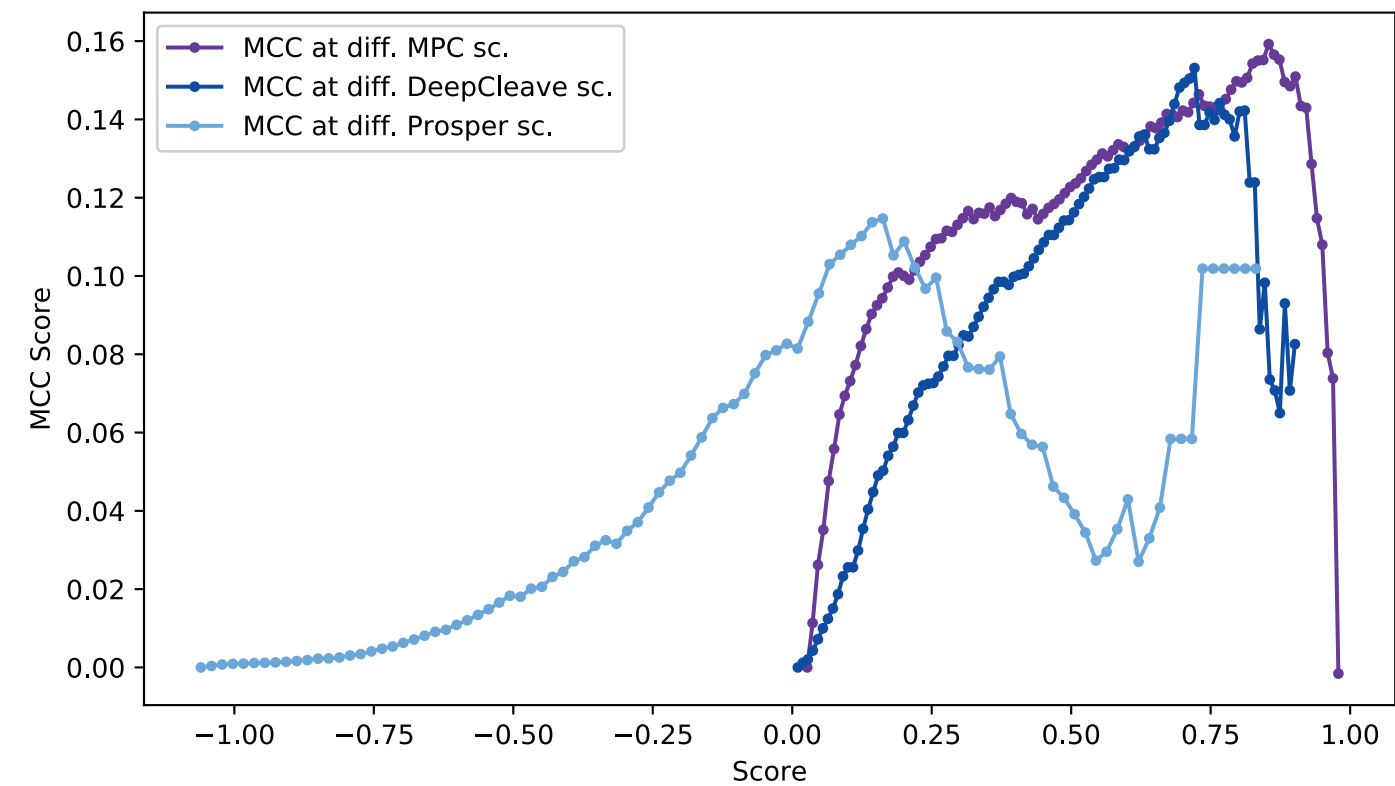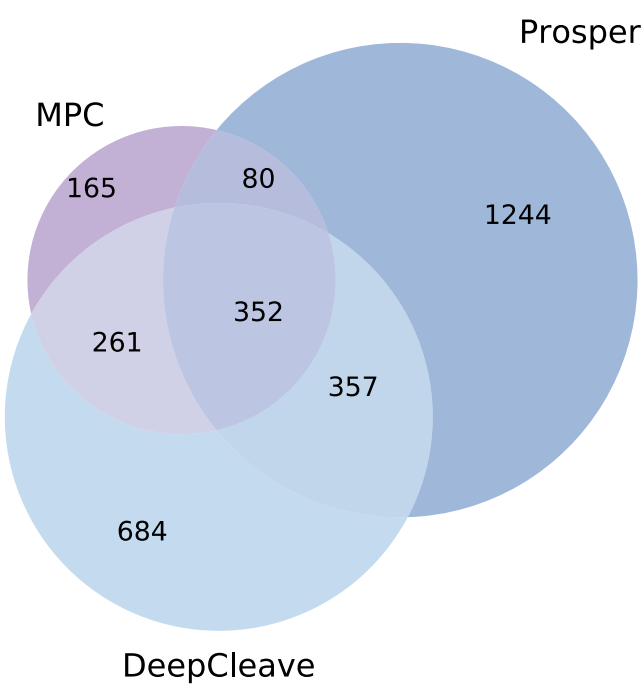

# MMP9 model performance against 15% test data

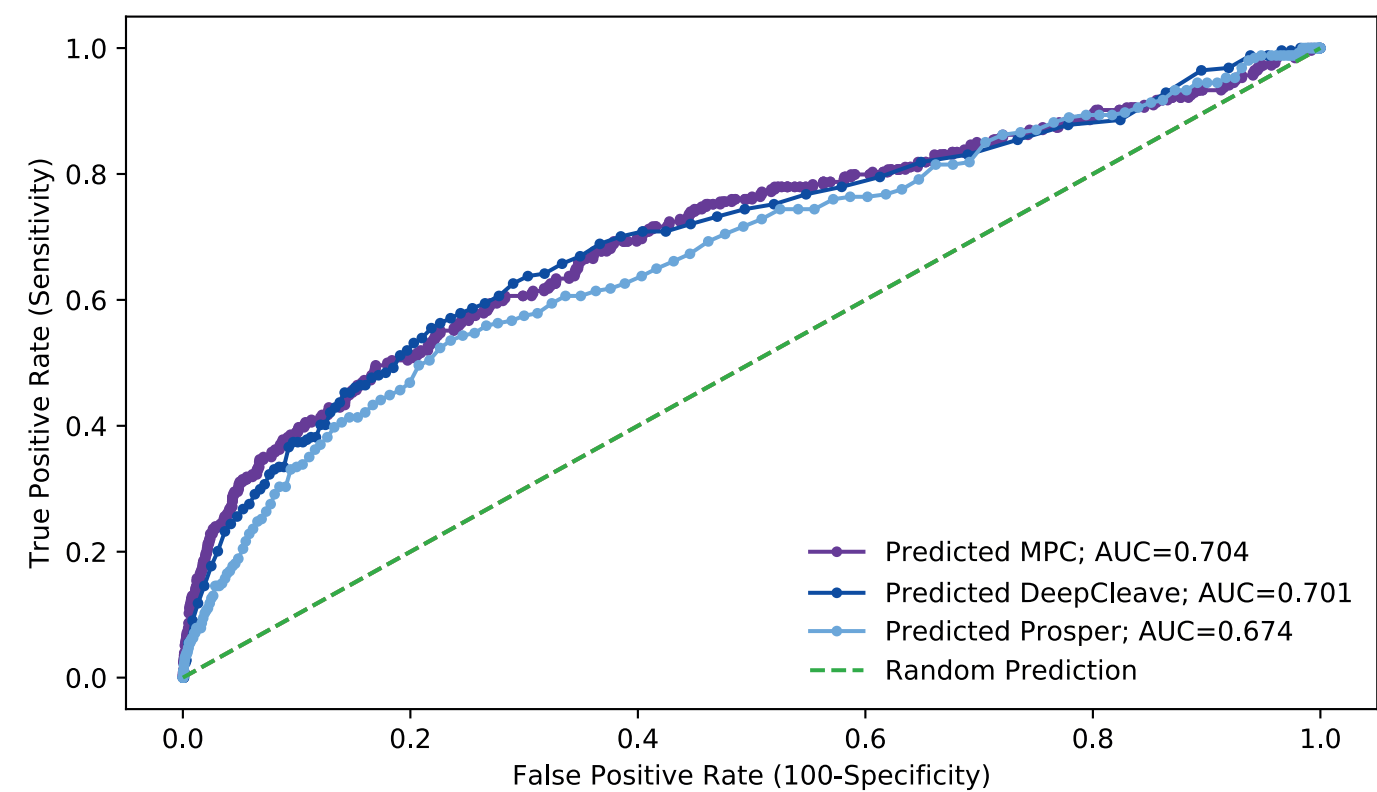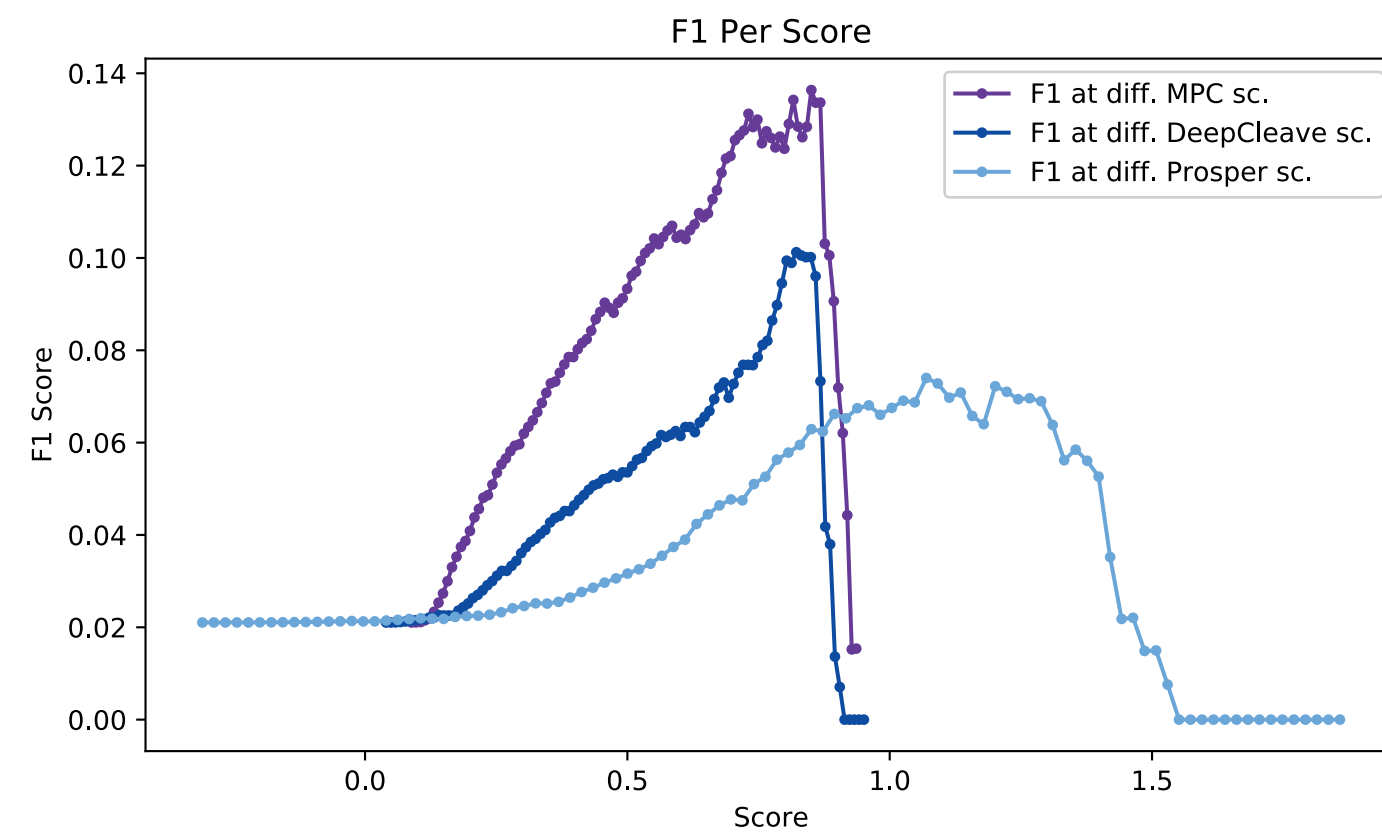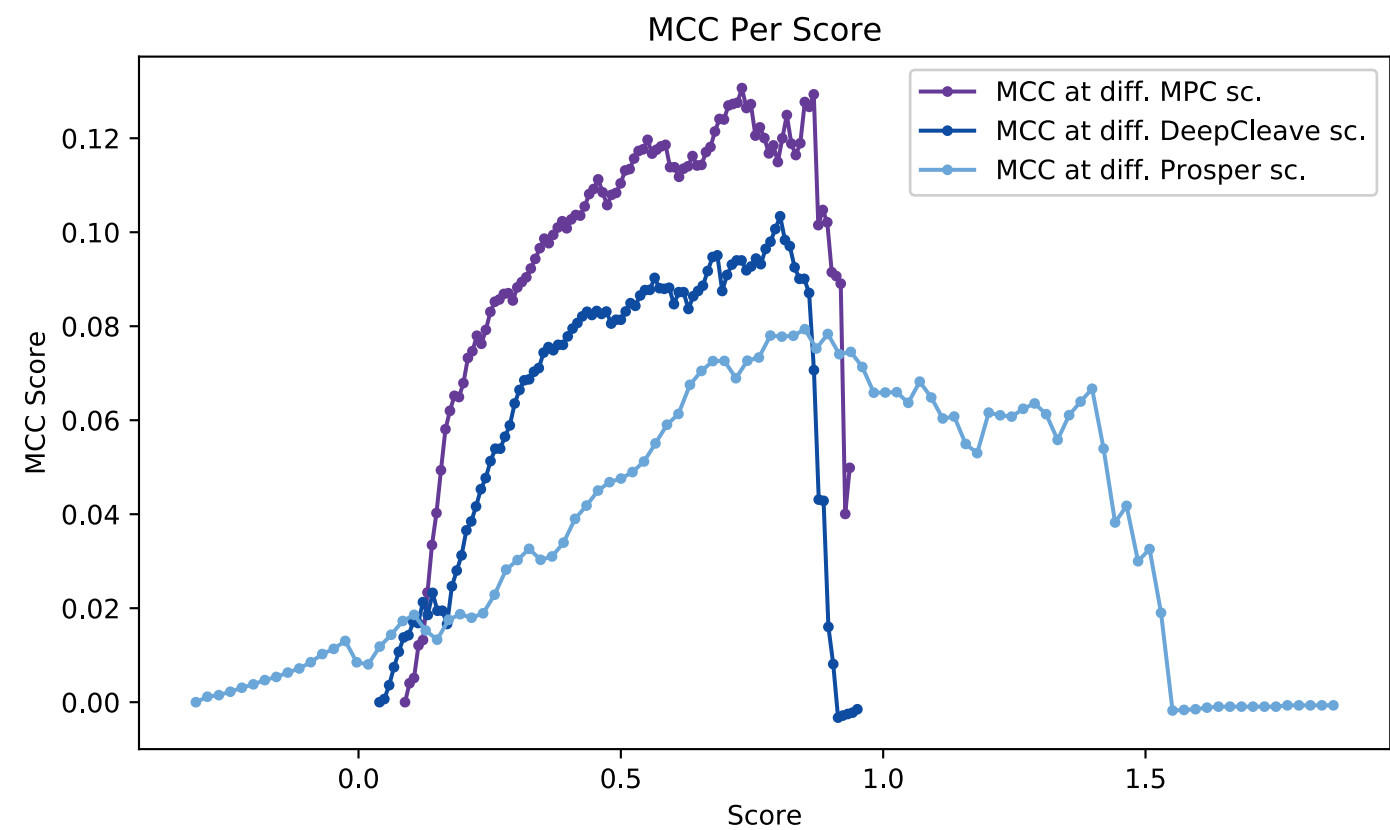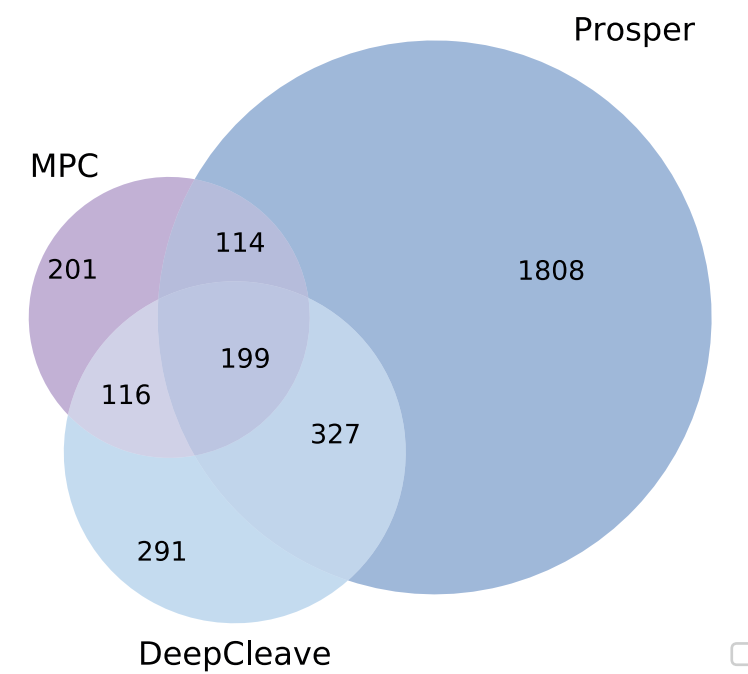

# MMP12 model performance against 15% test data

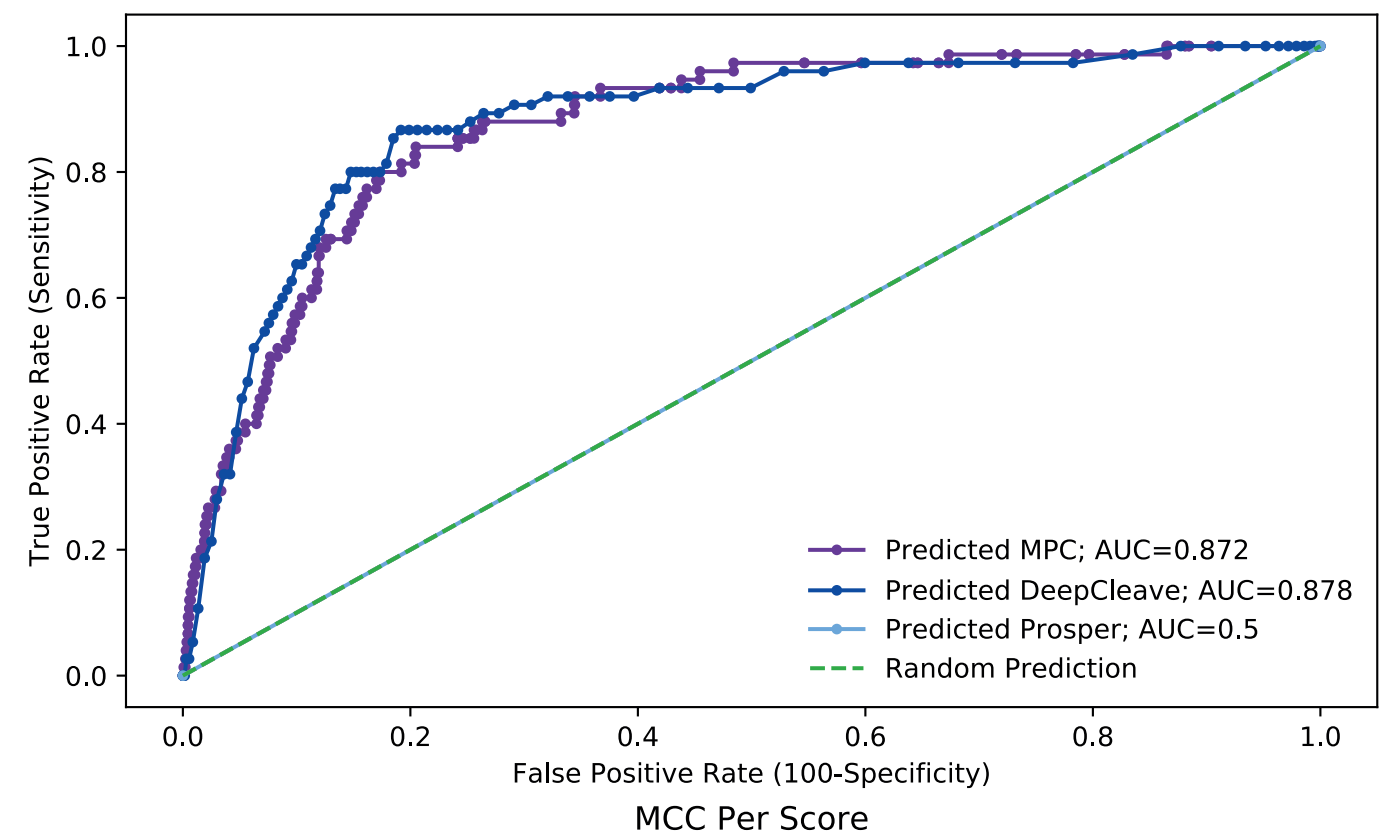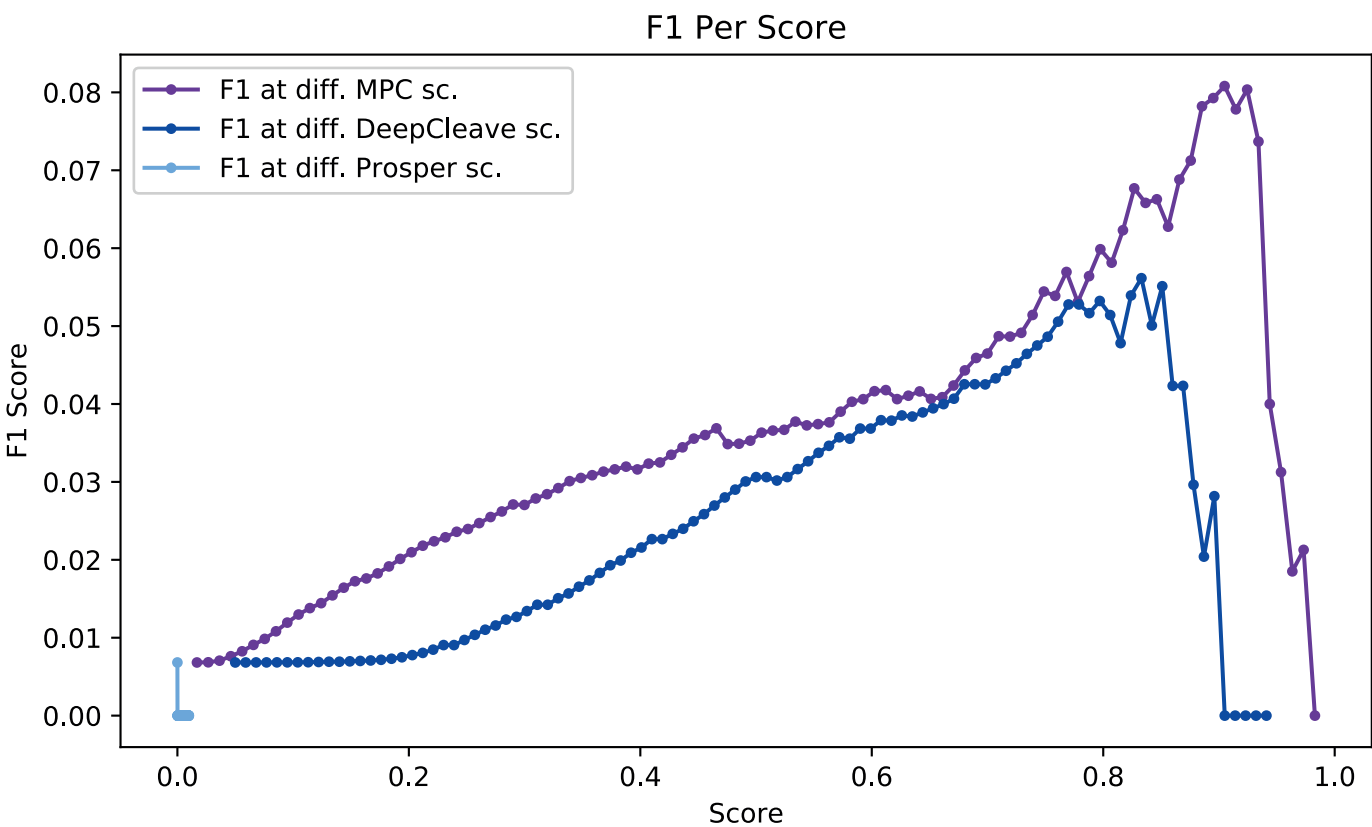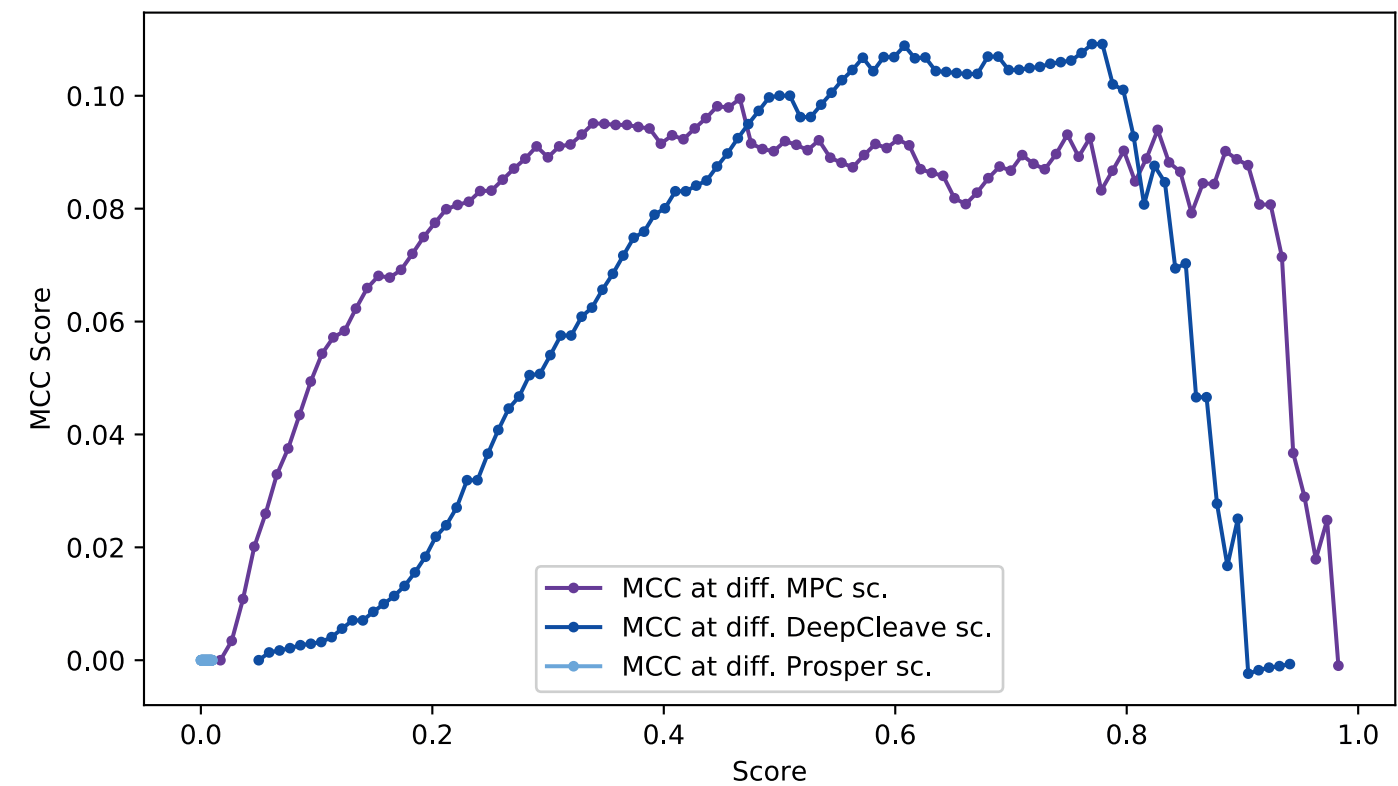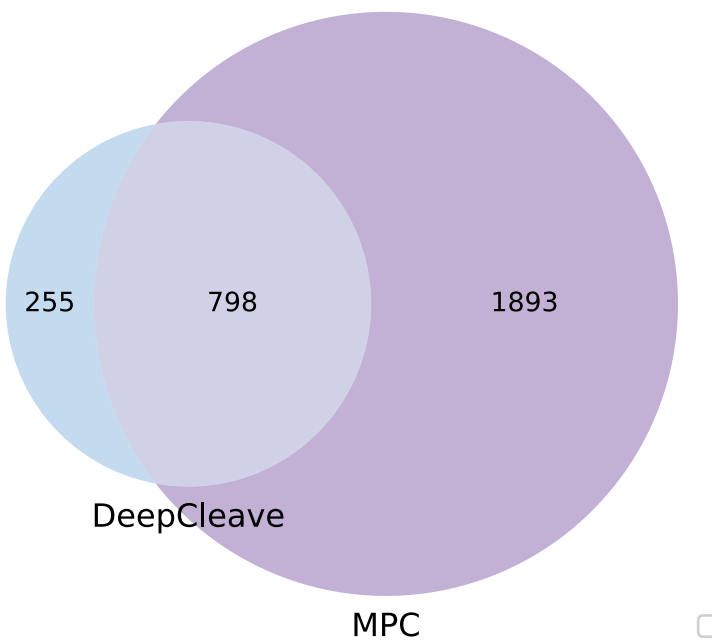

# MMP13 model performance against 15% test data

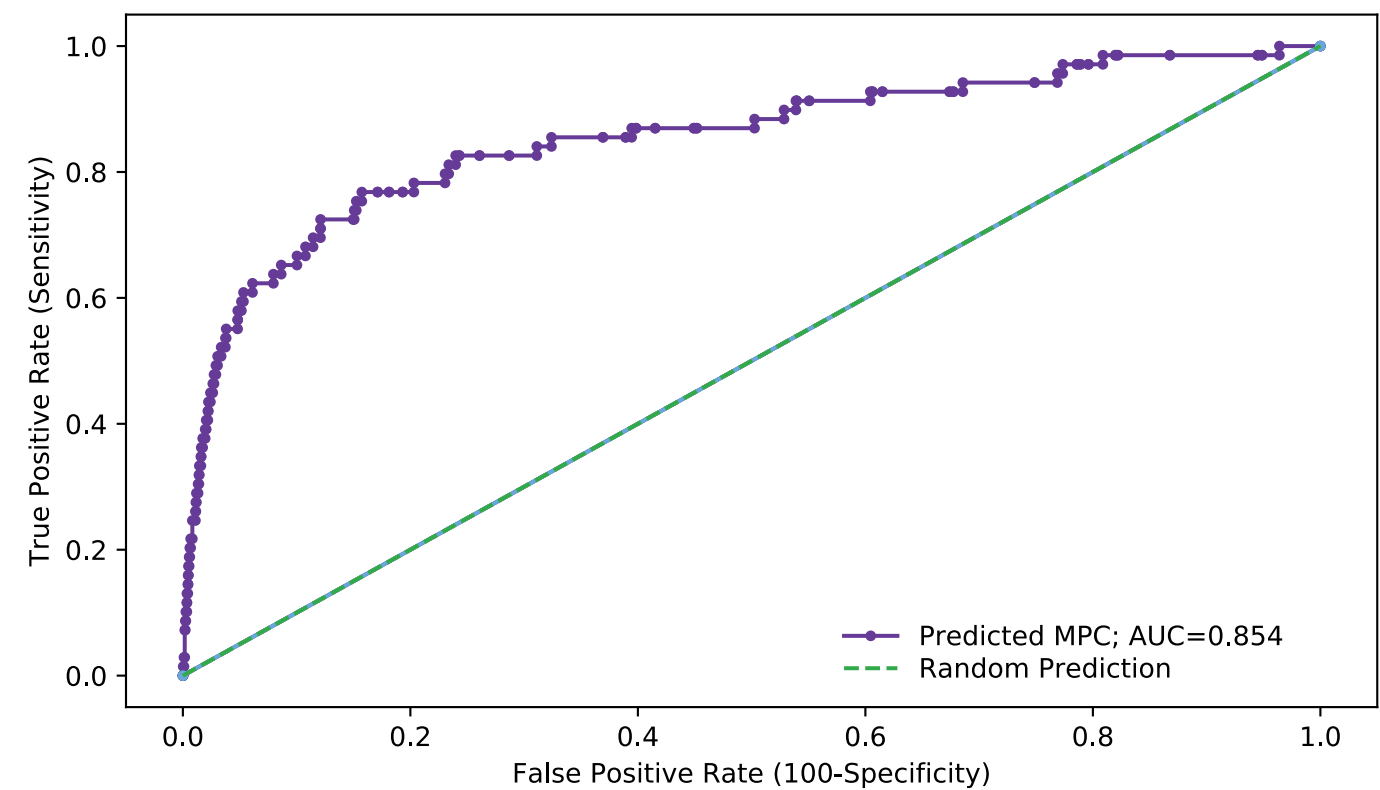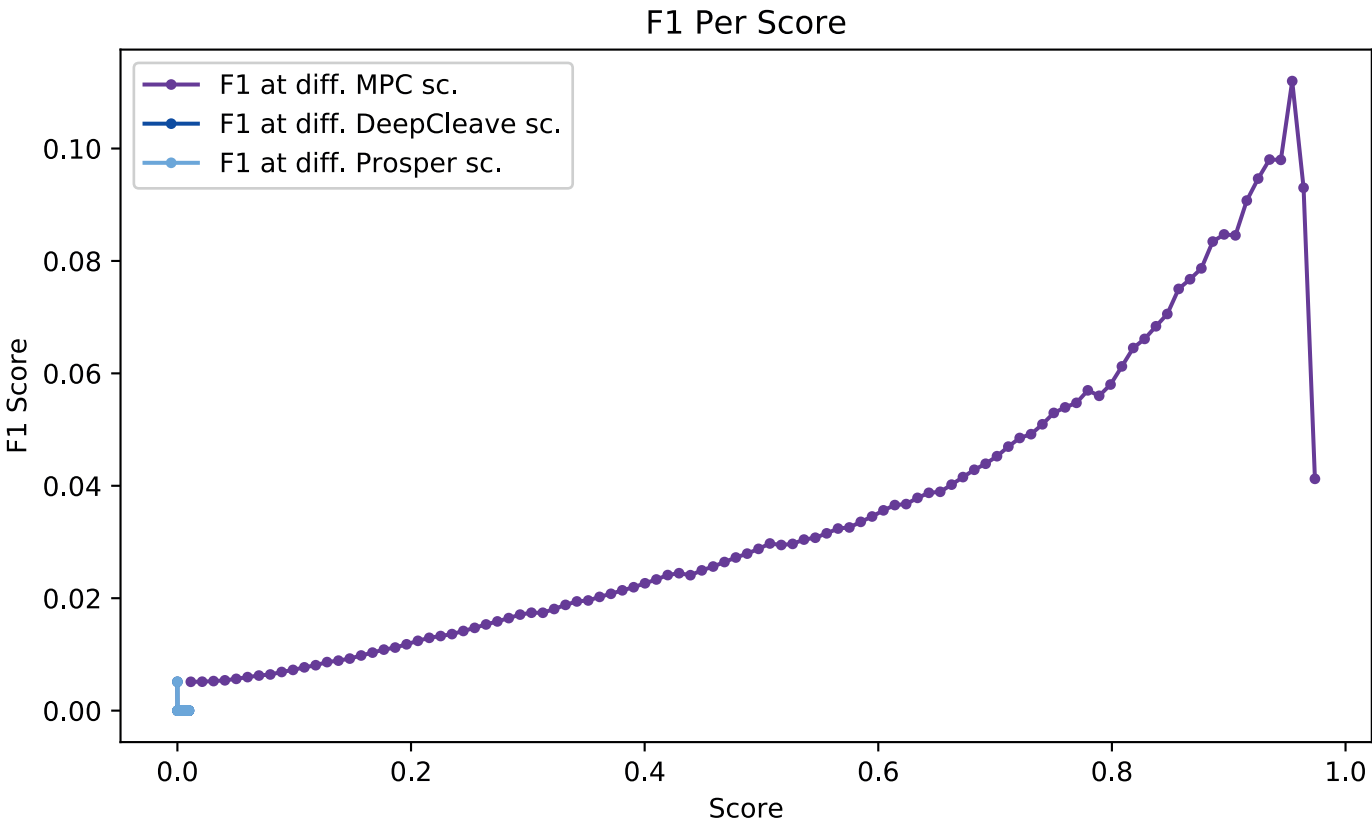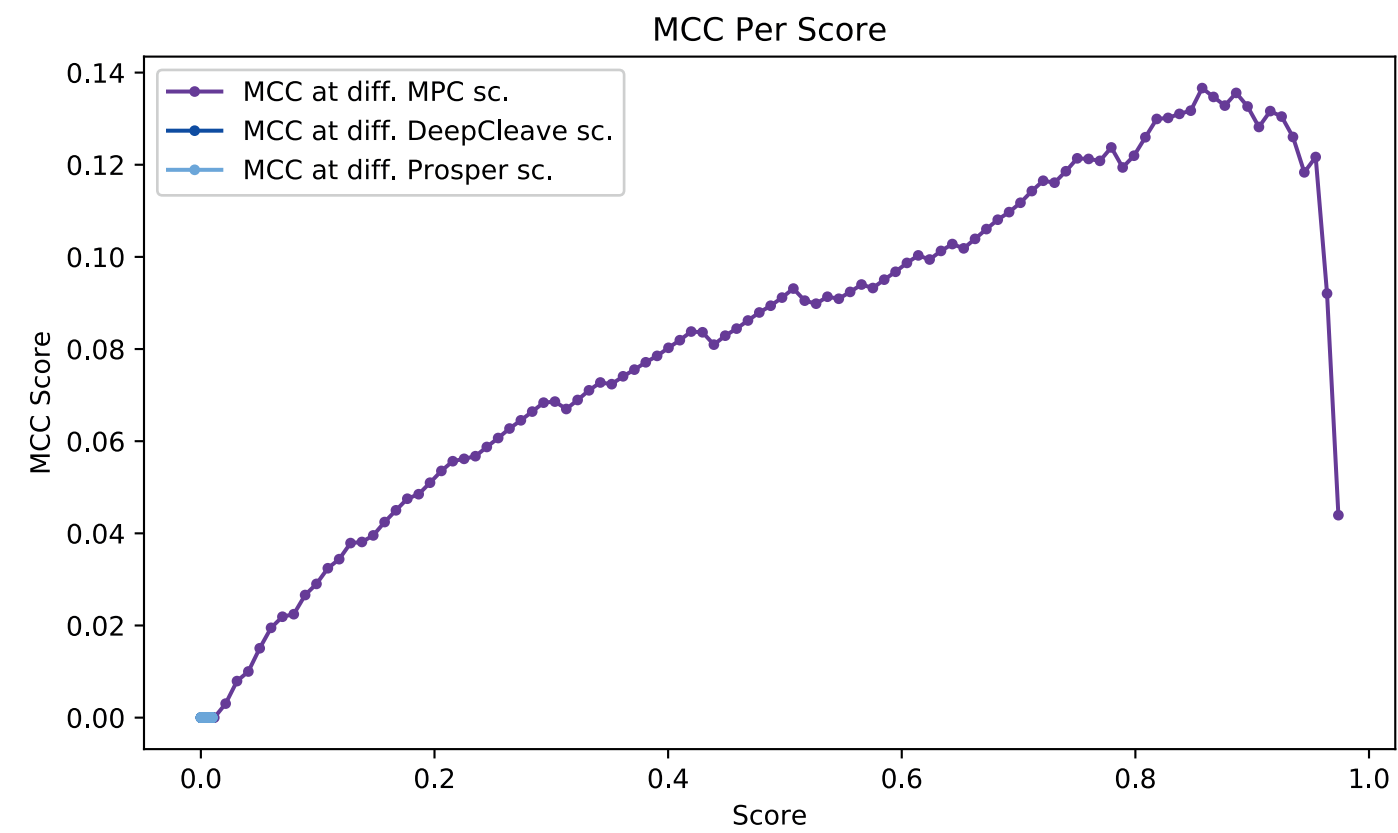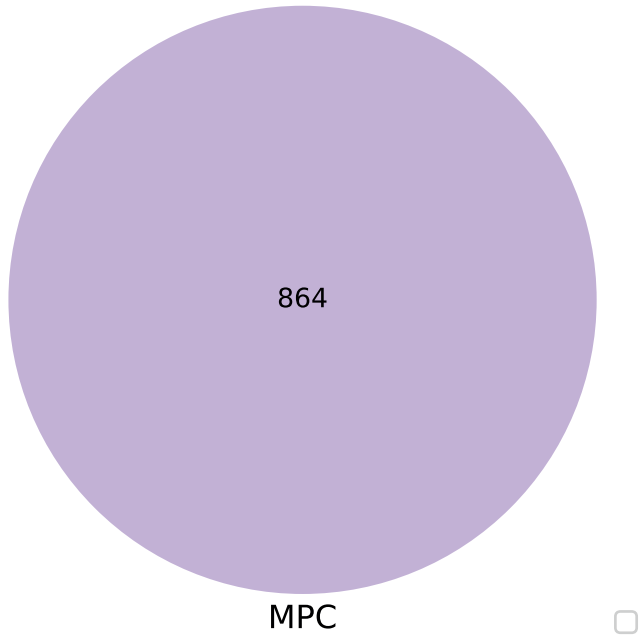

# MMP14 model performance against 15% test data

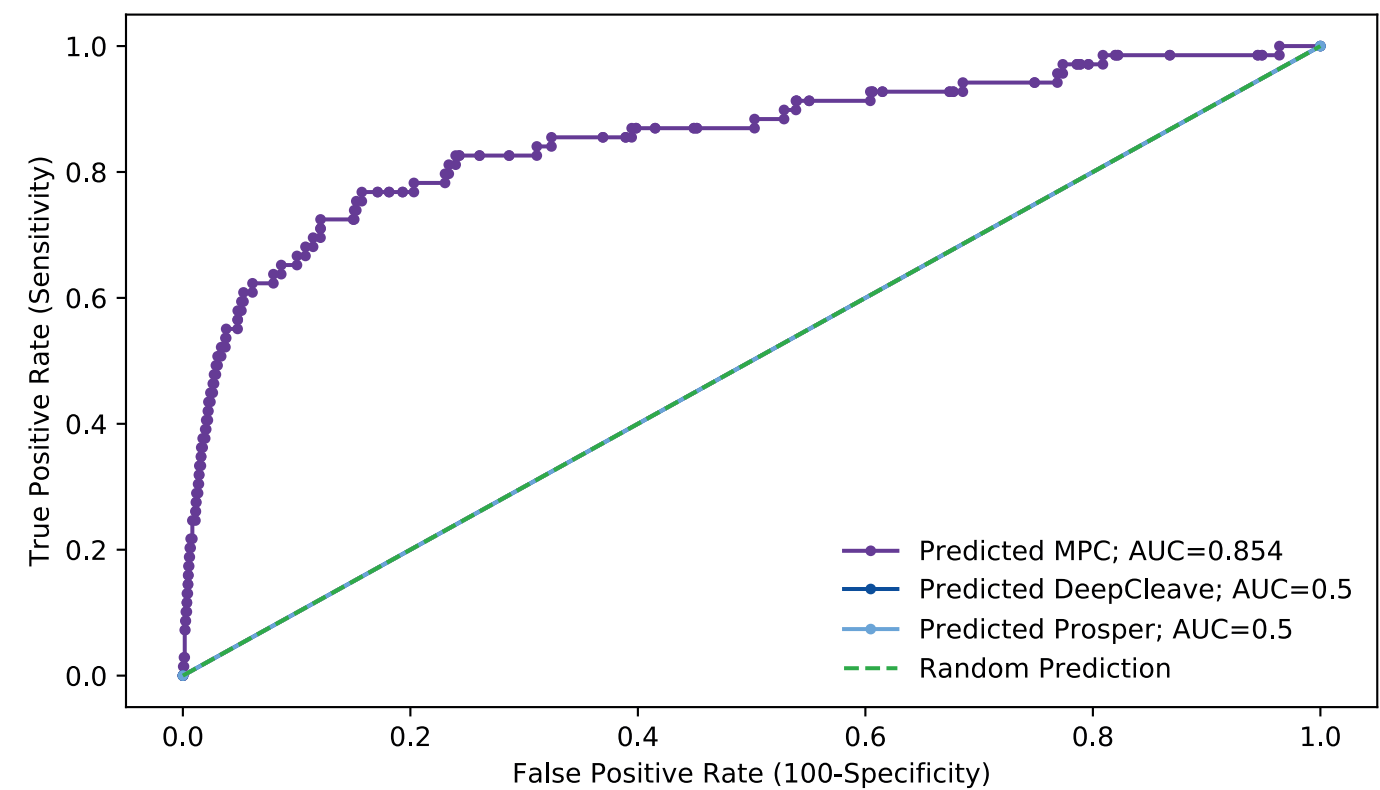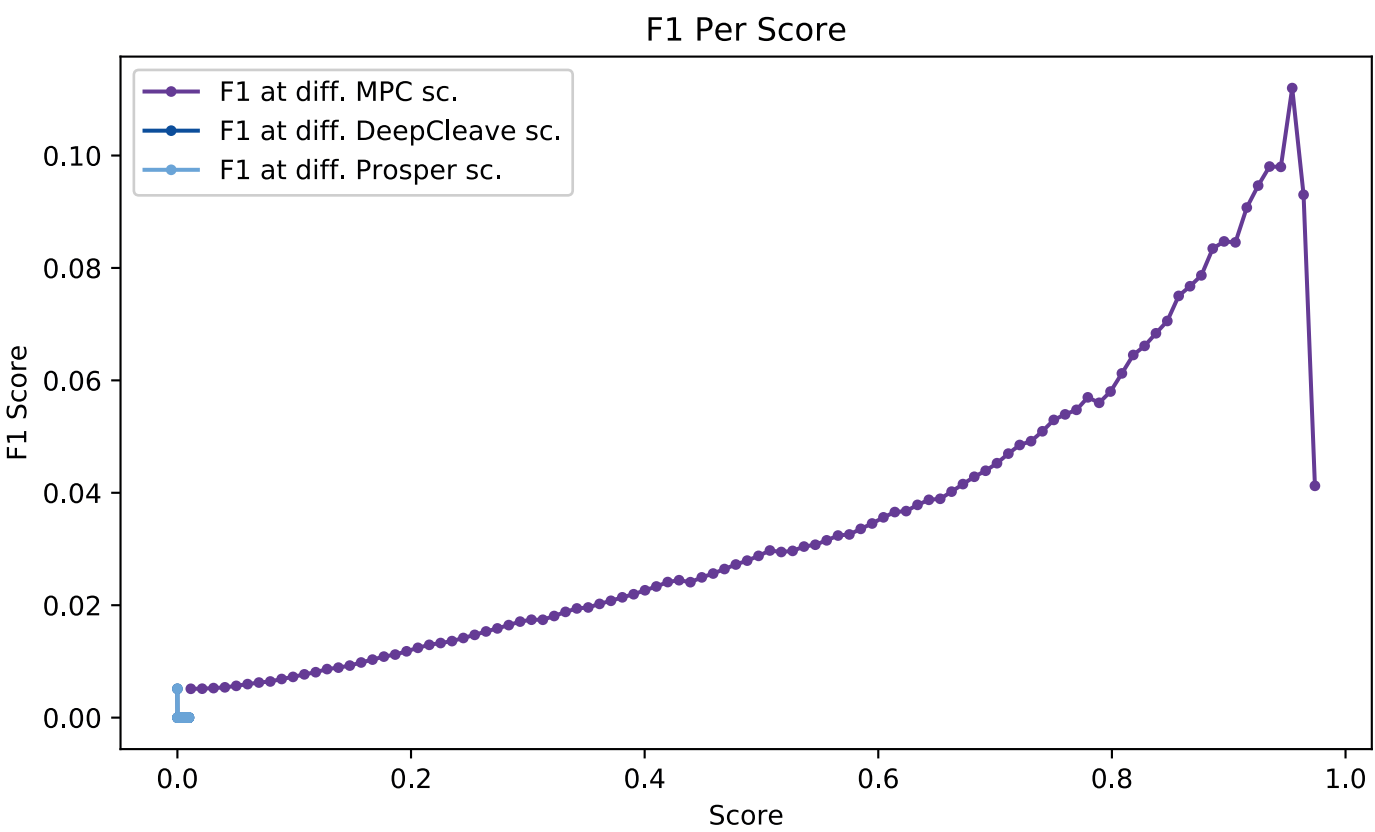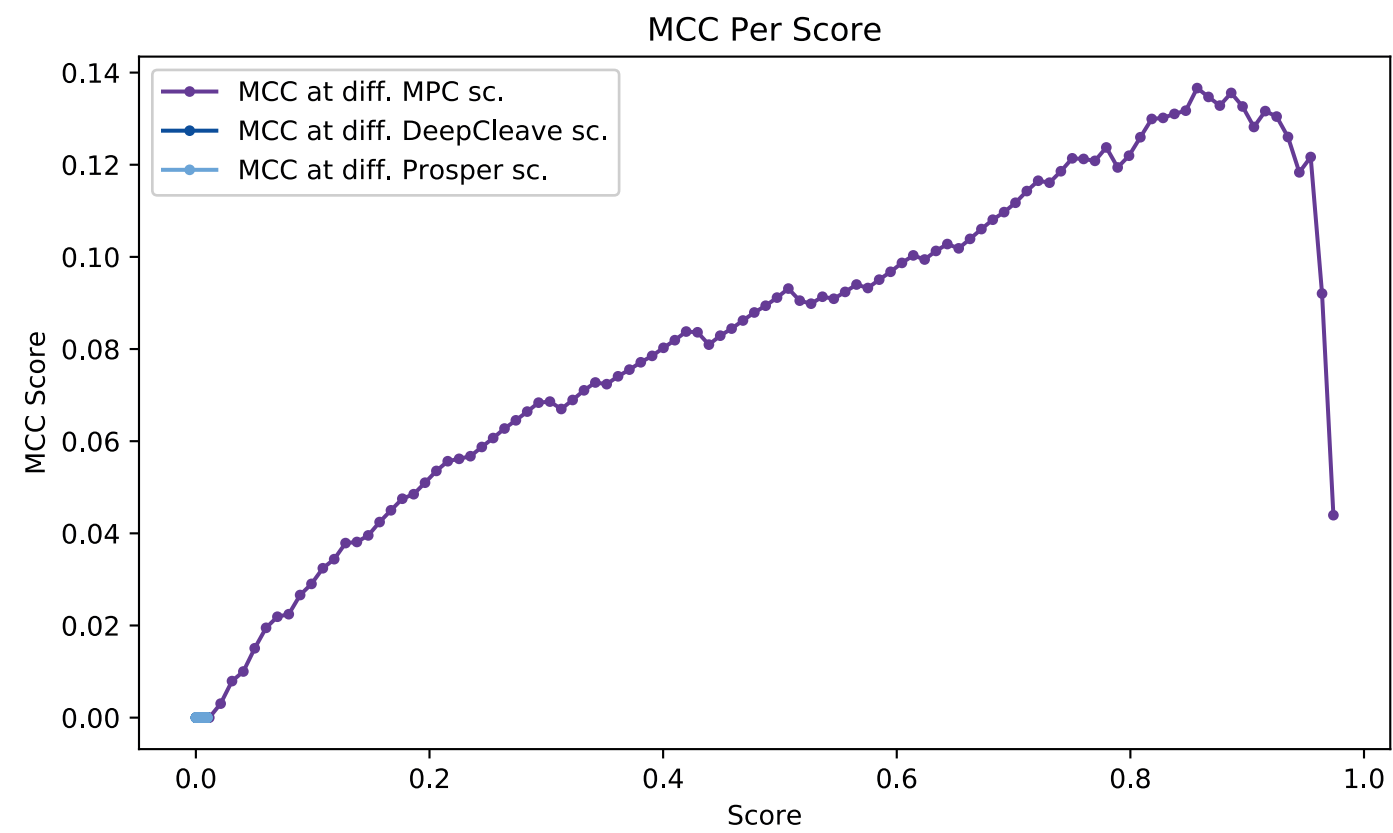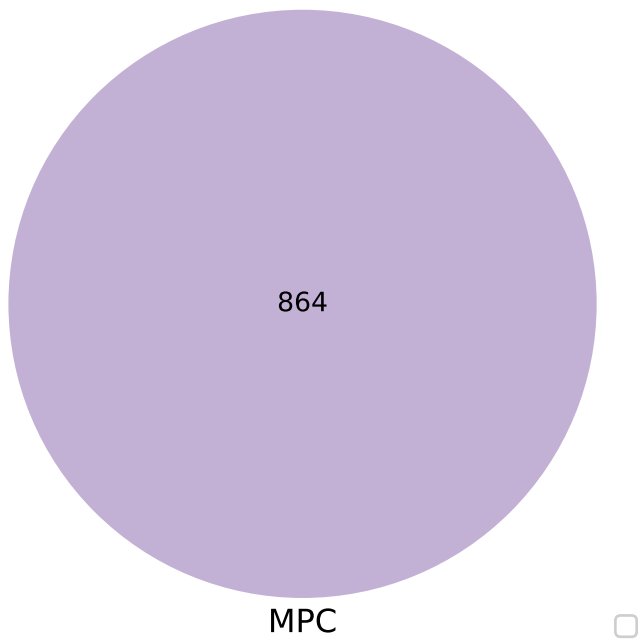



# Elastase-2 model performance against 15% test data

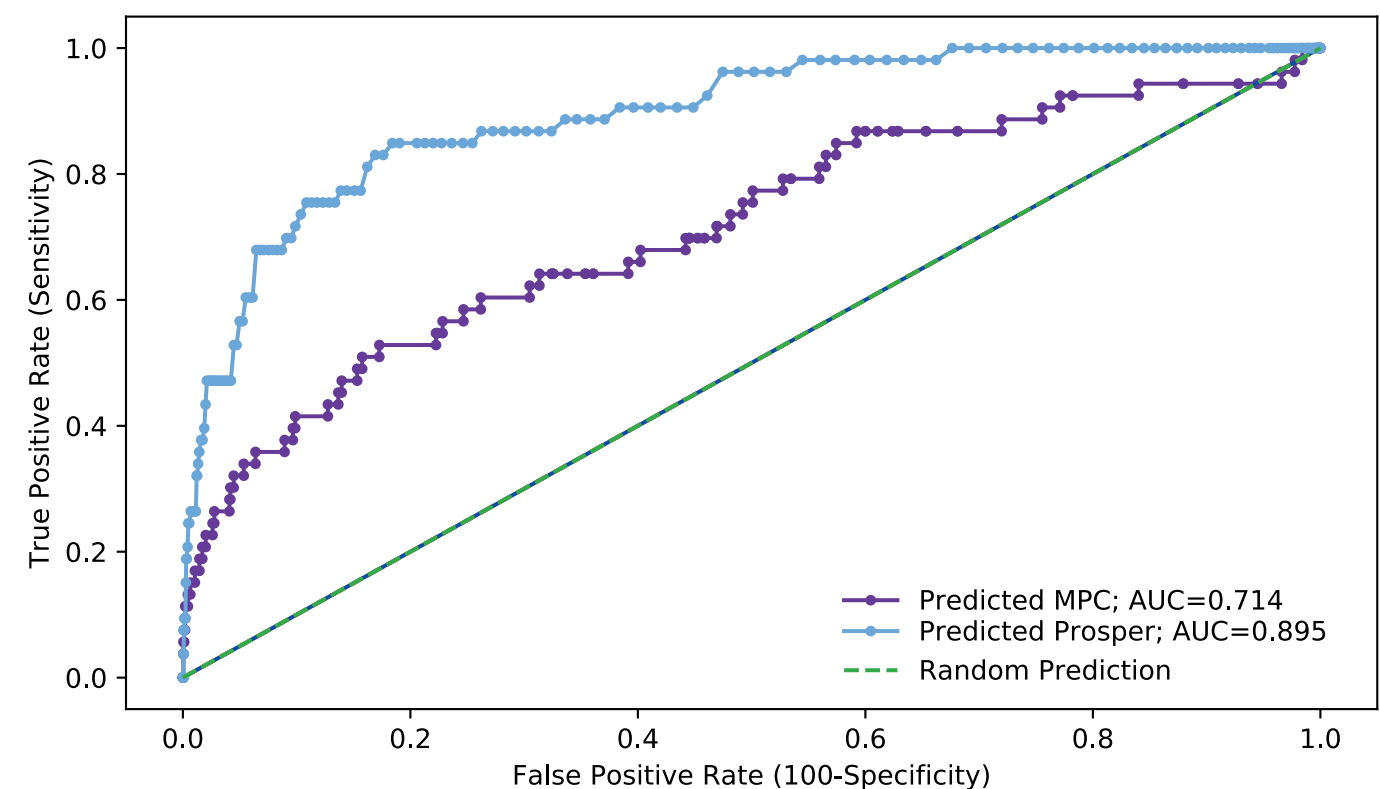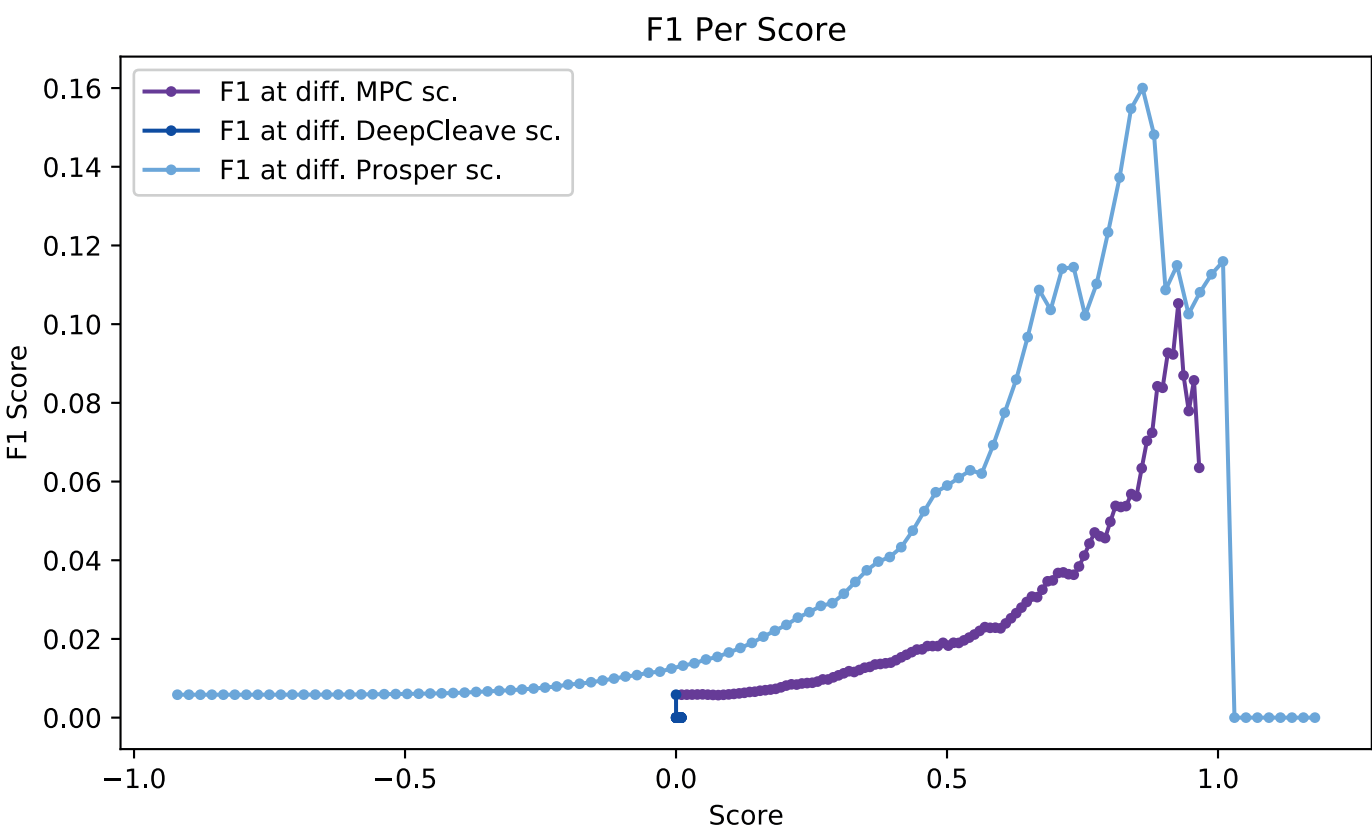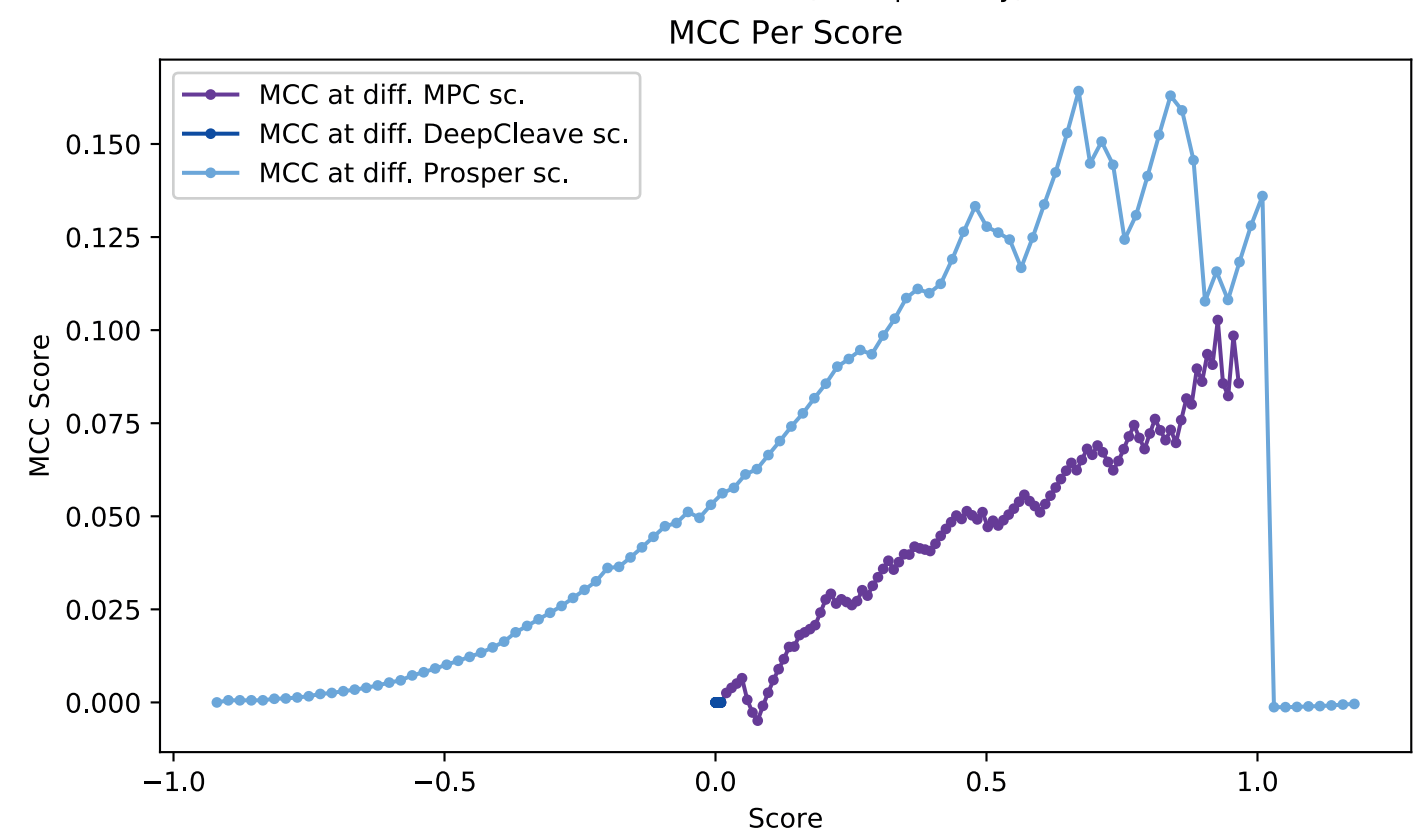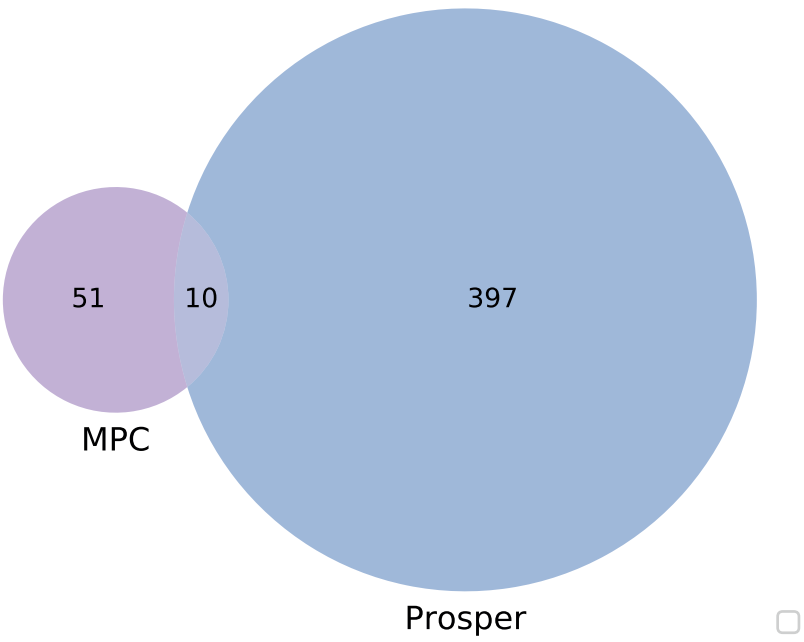

# Granzyme-B model performance against 15% test data

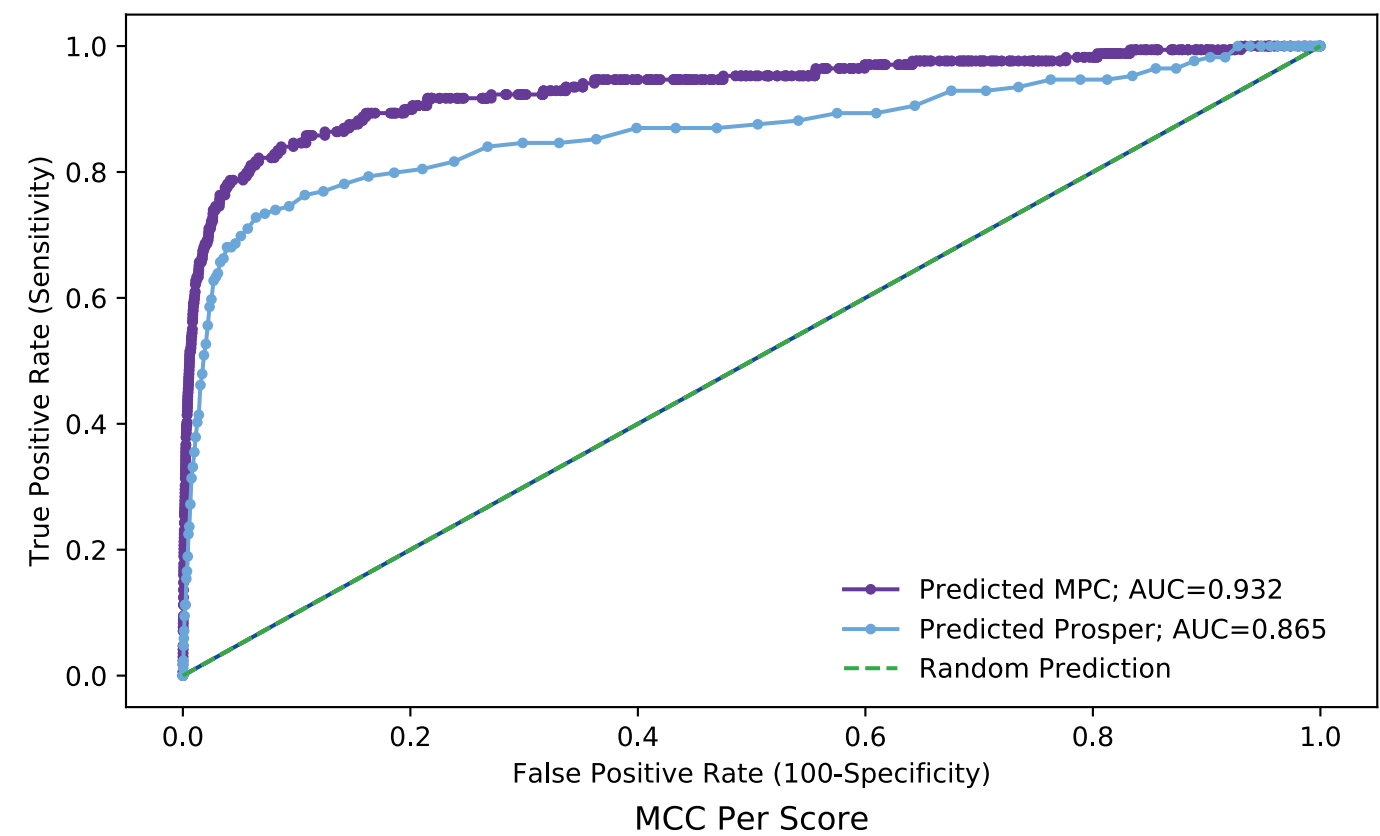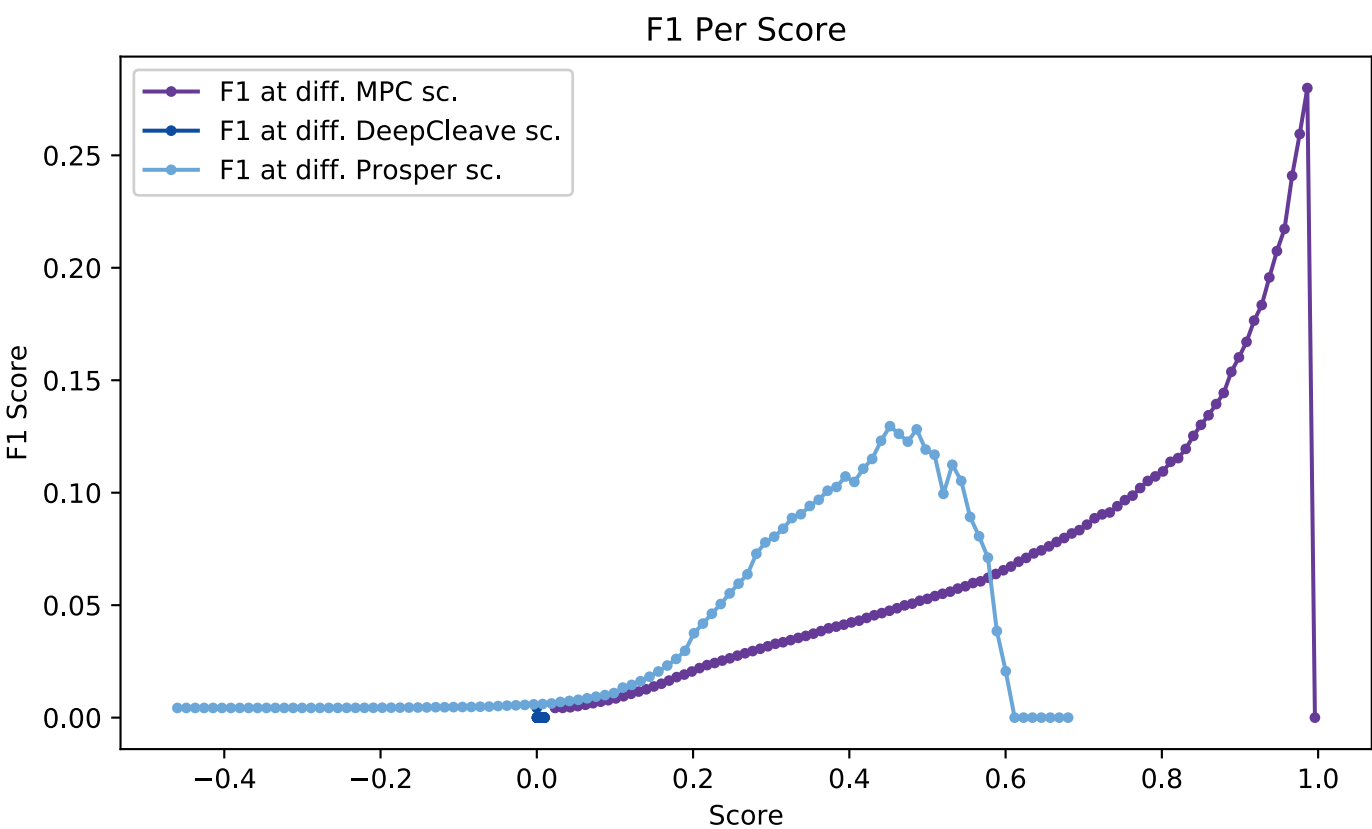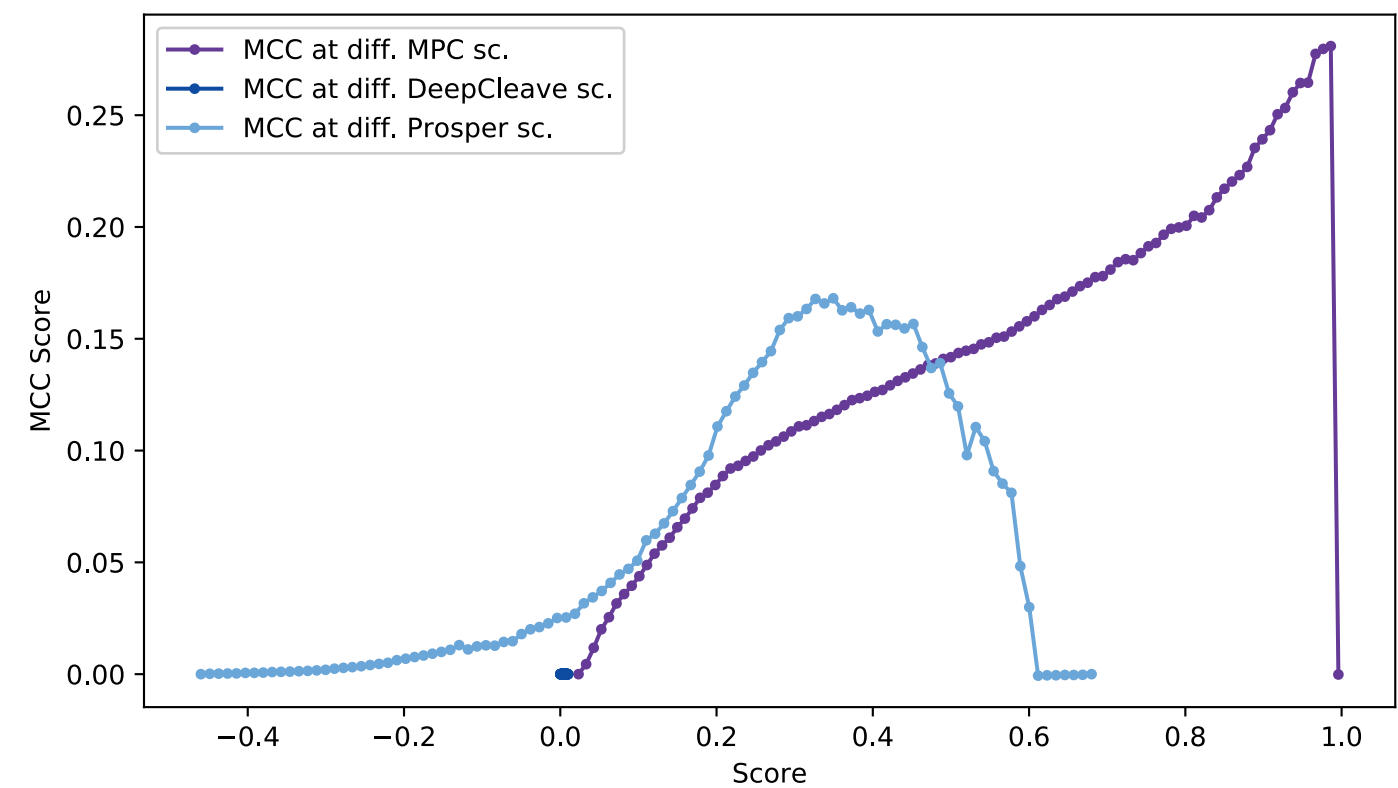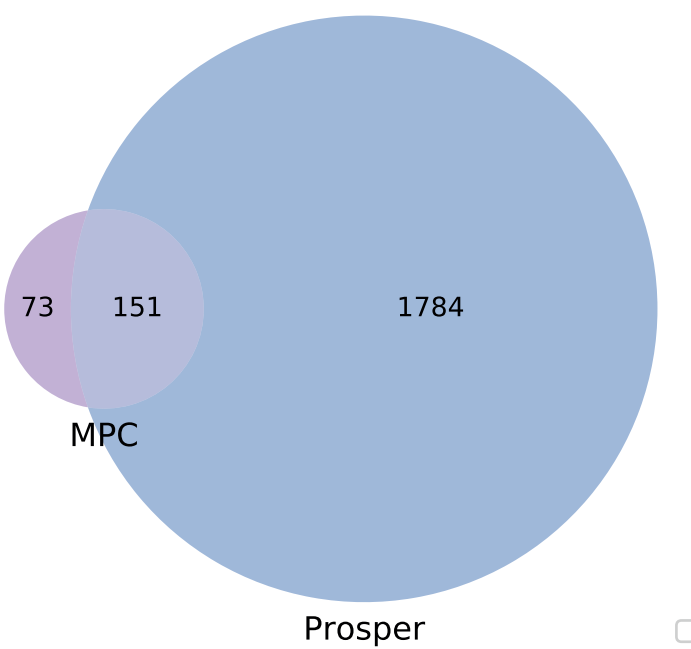

# Cathepsin-B model performance against 15% test data

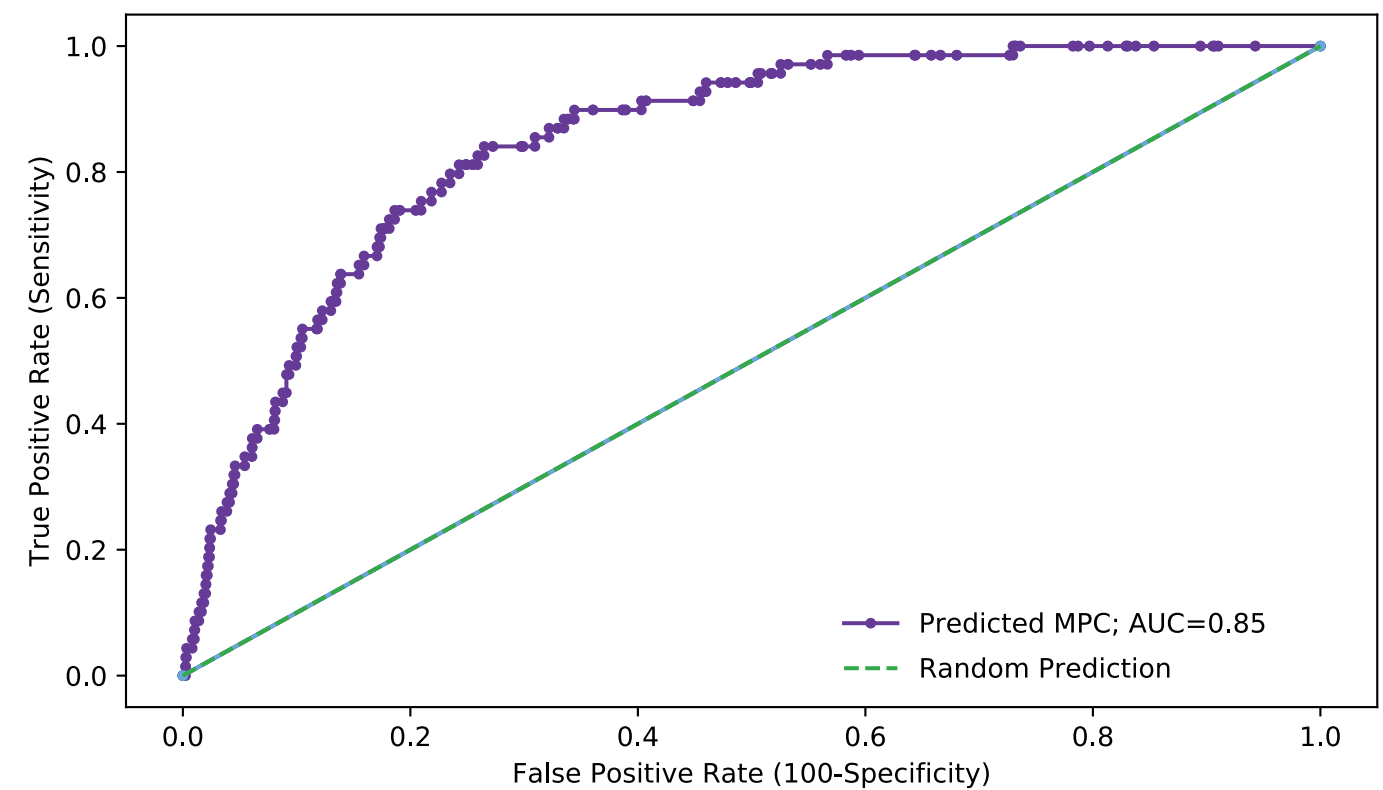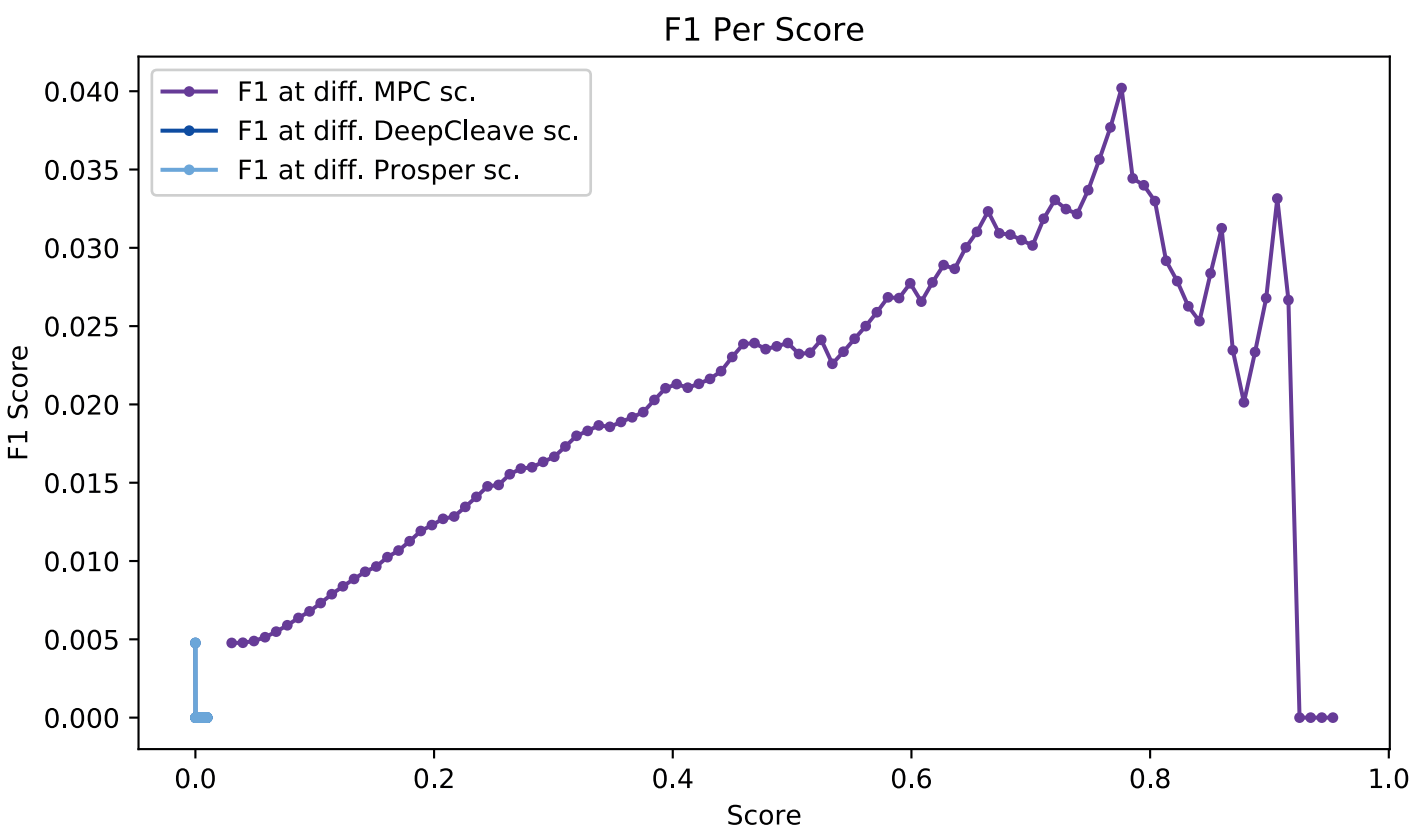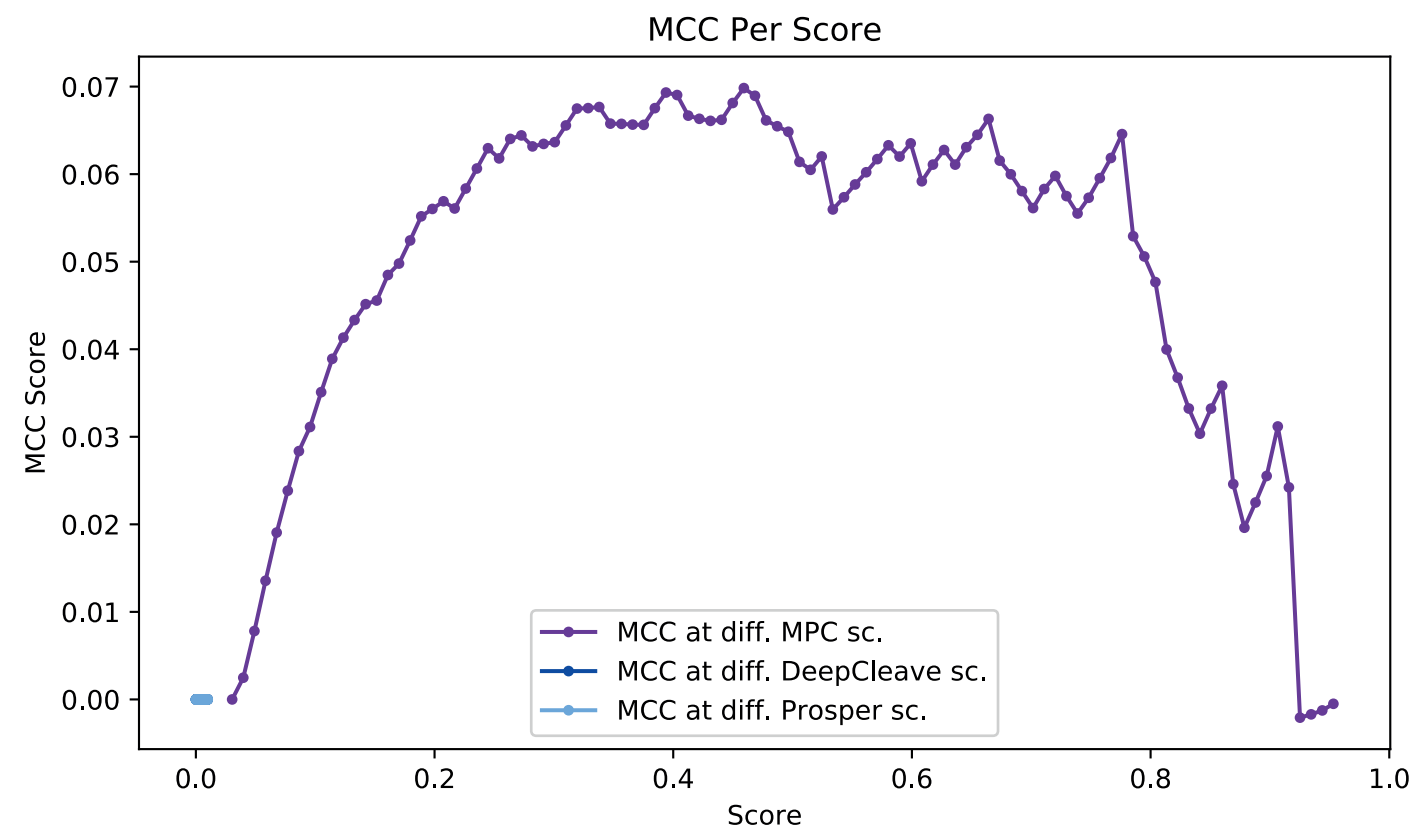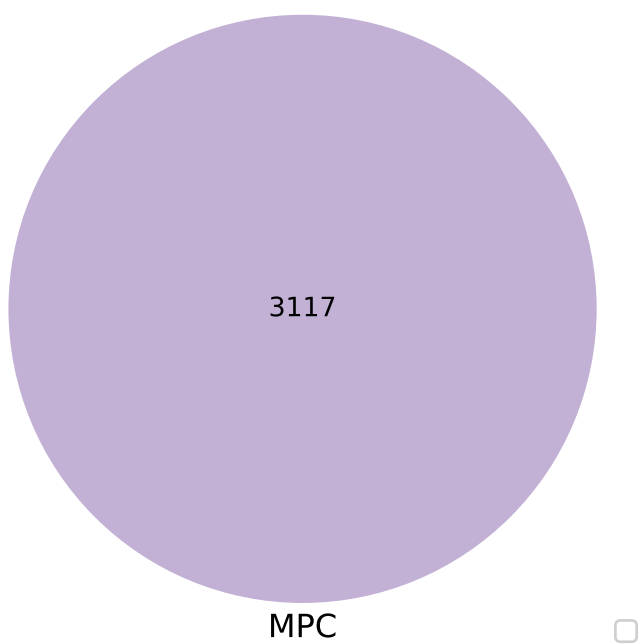

# Cathepsin-K model performance against 15% test data

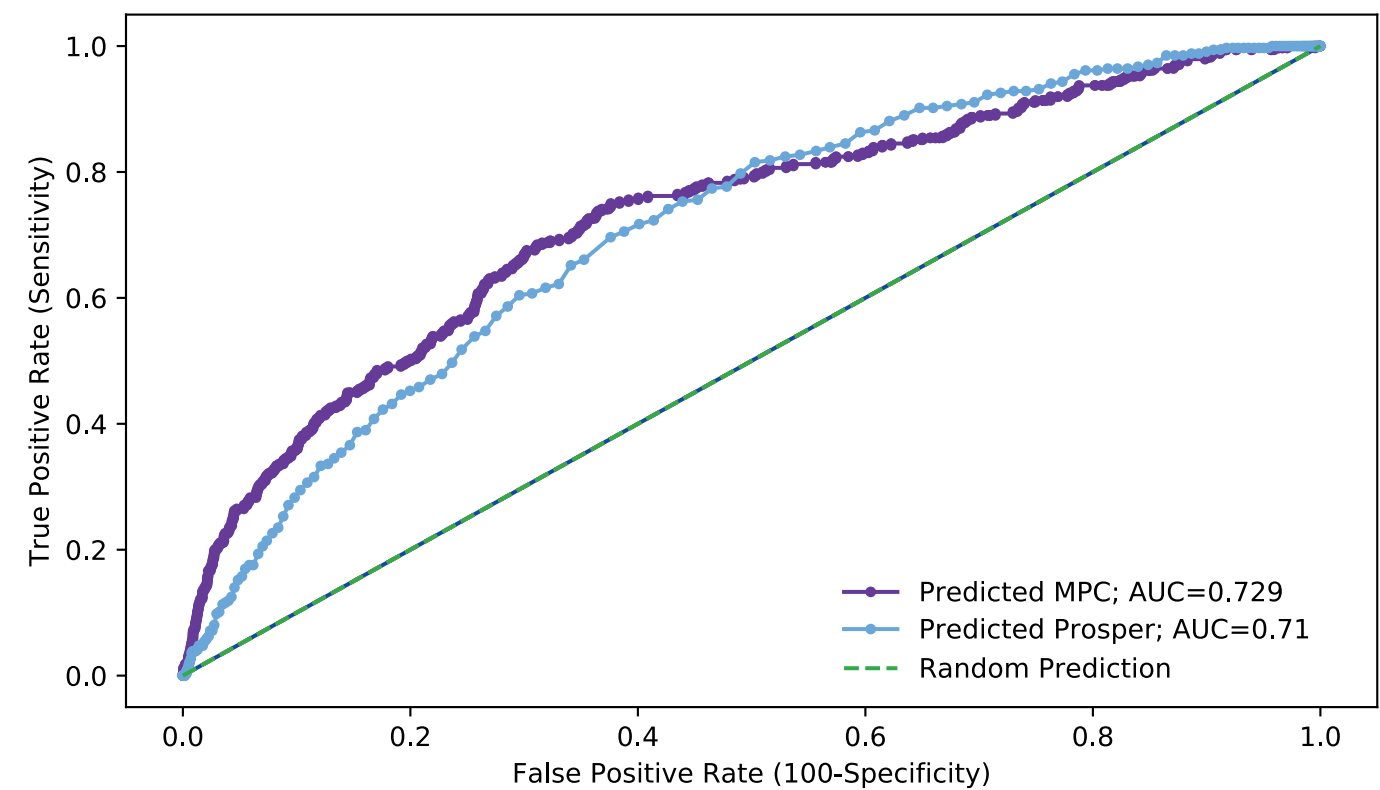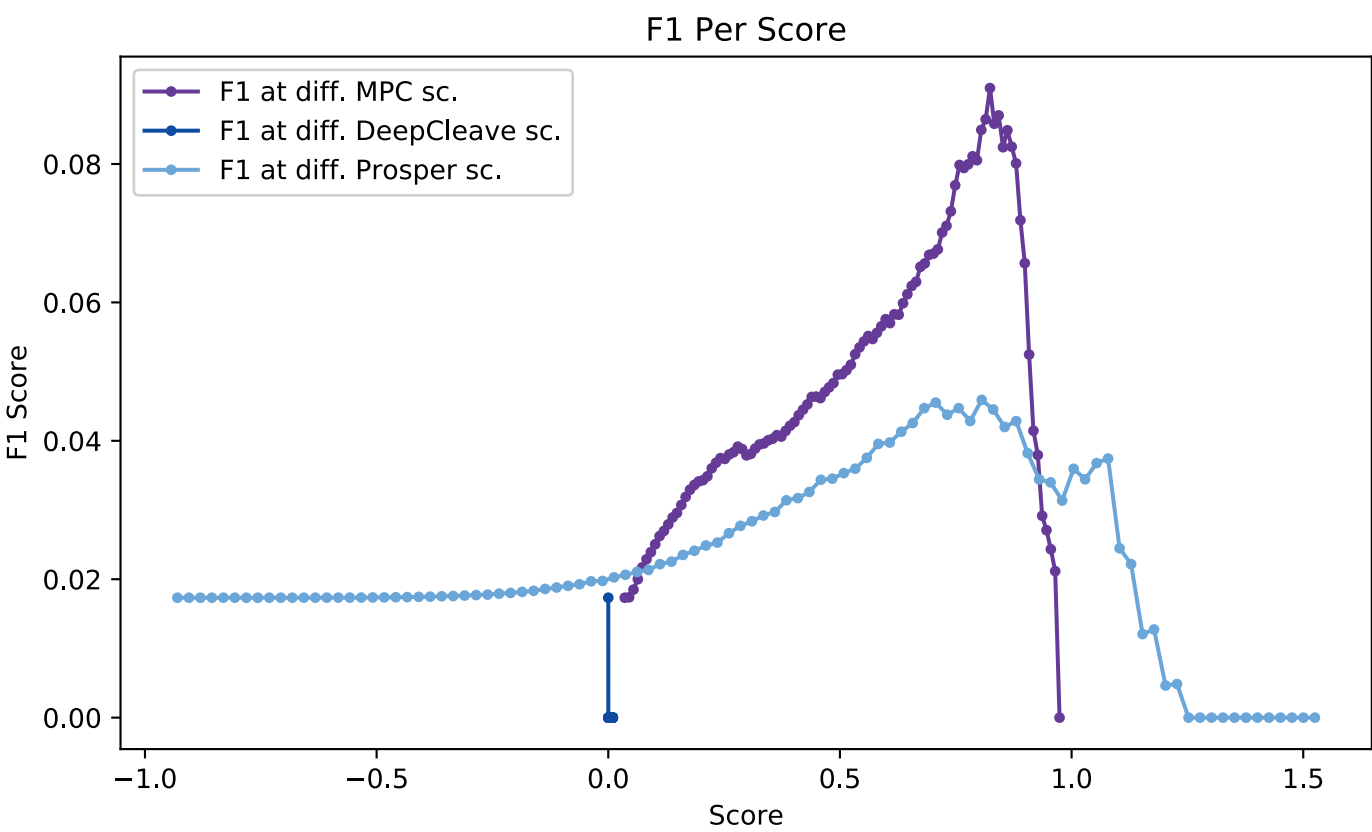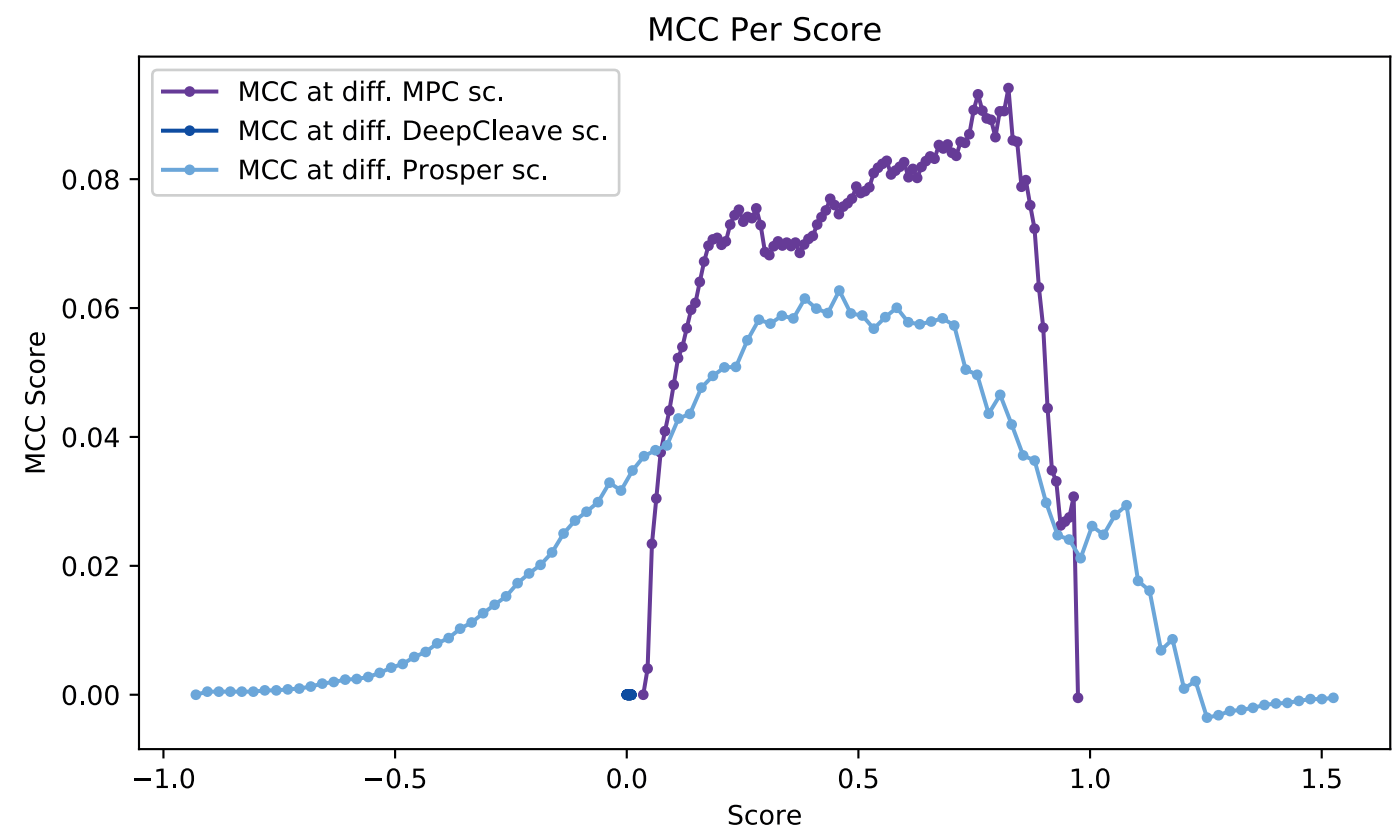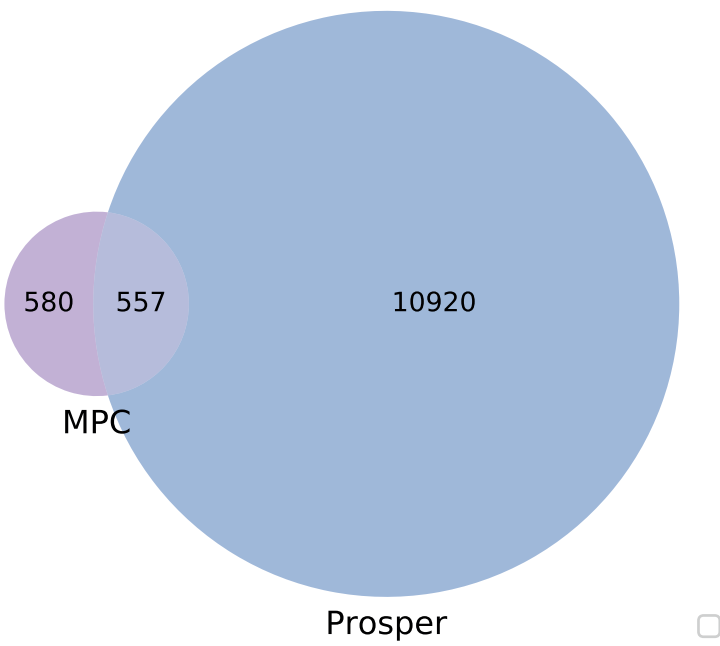

# Cathepsin-G model performance against 15% test data

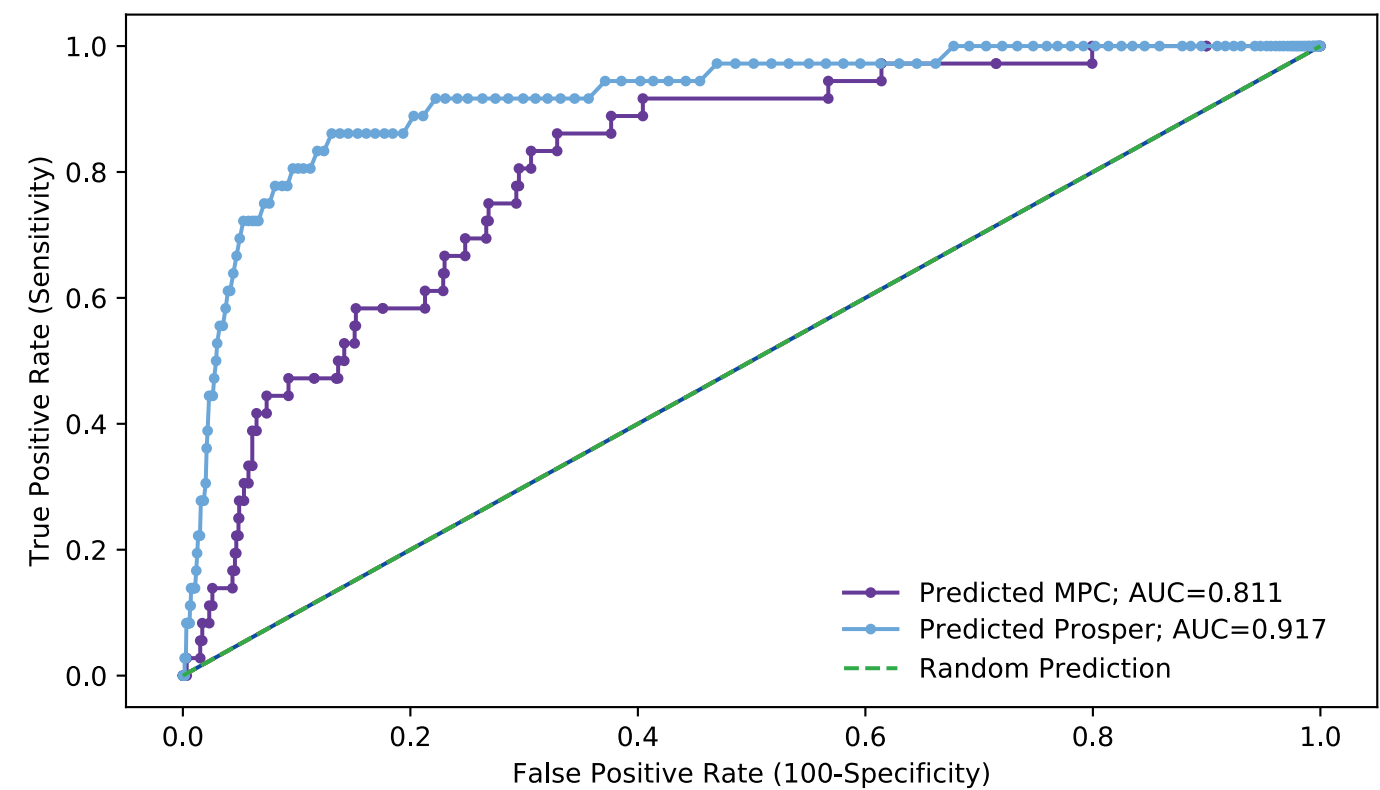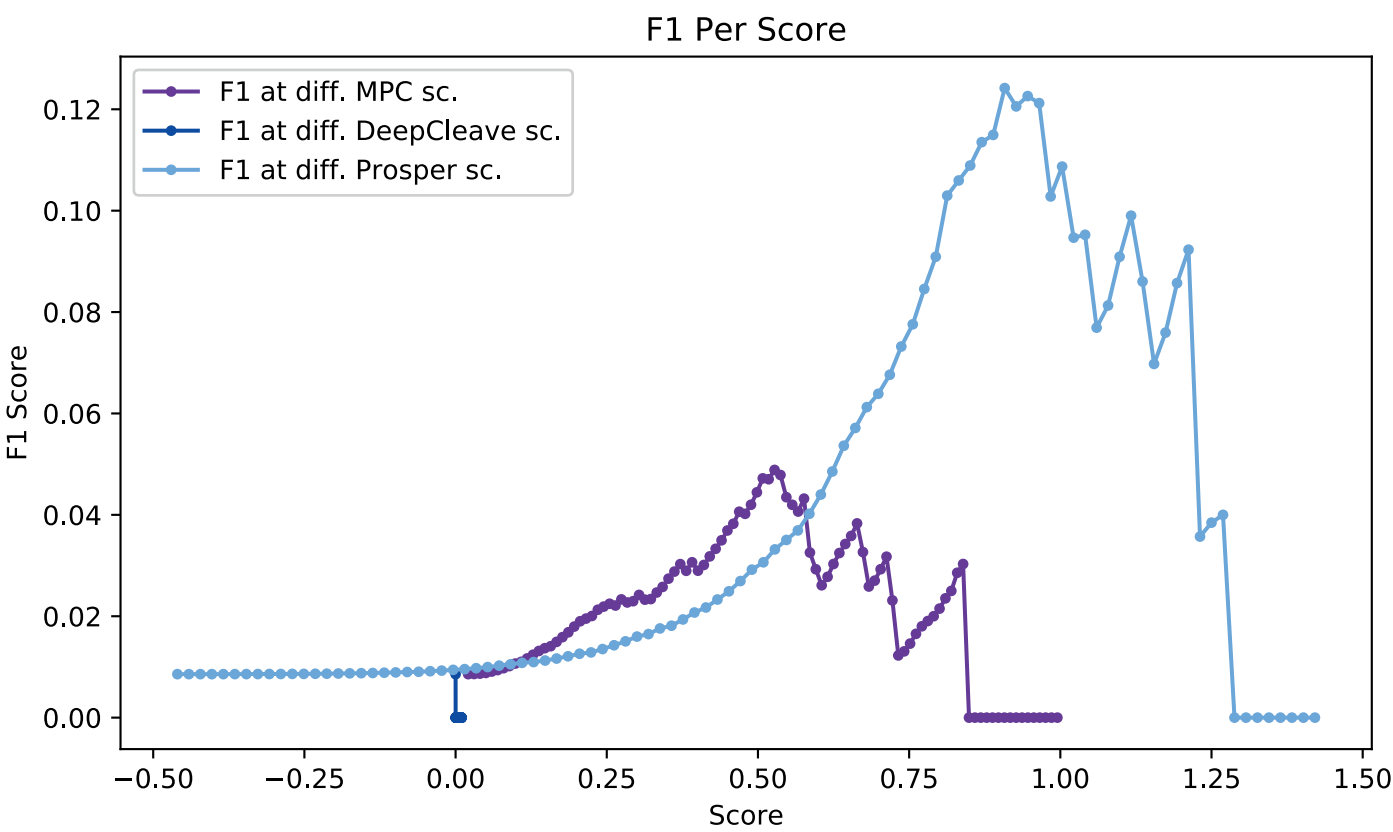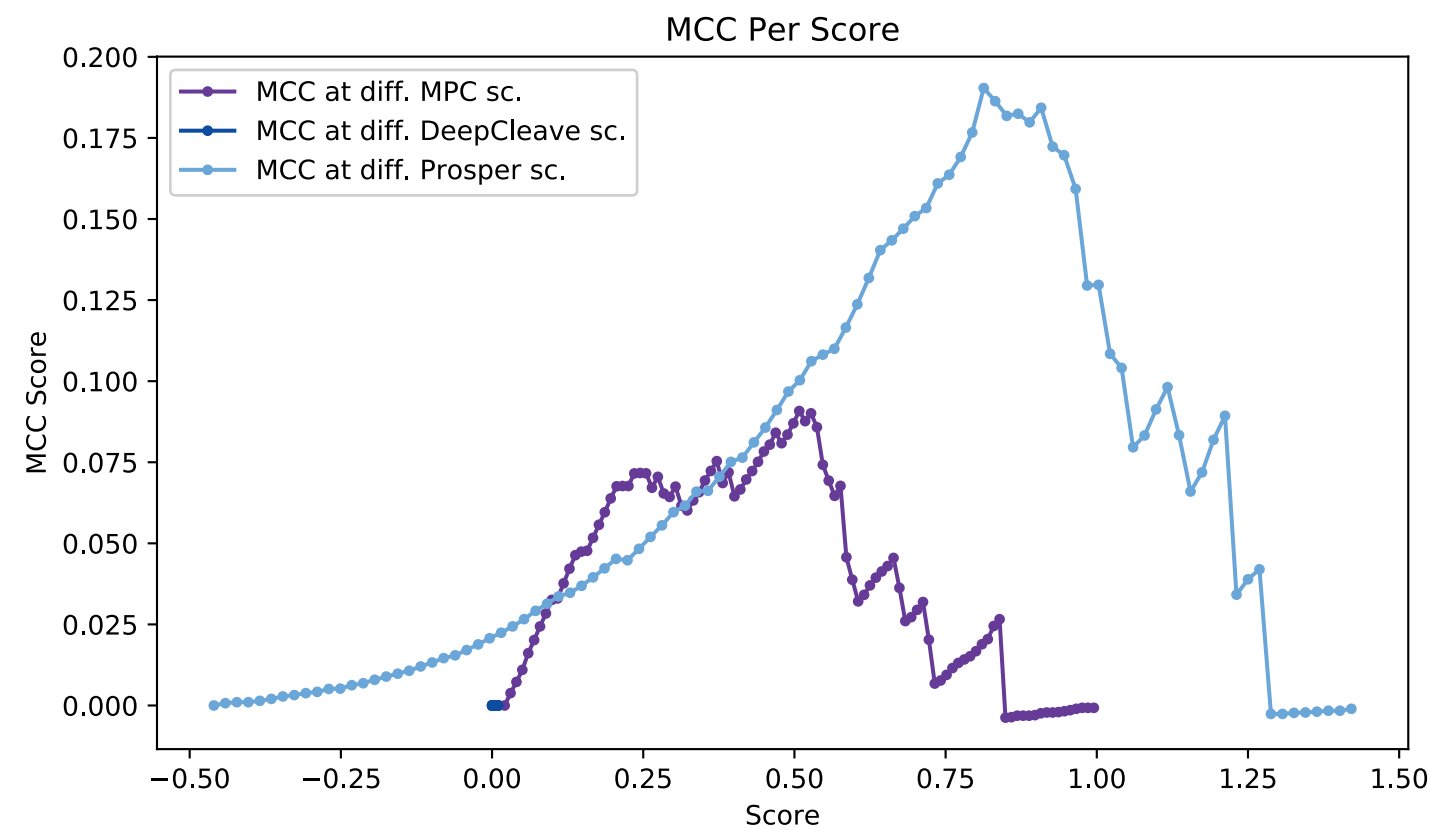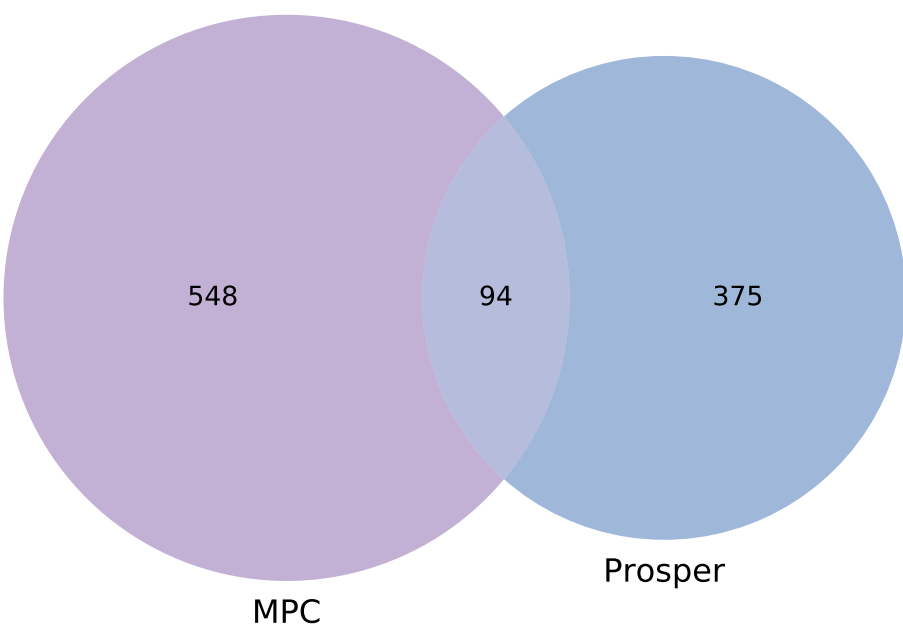

# Cathepsin-D model performance against 15% test data

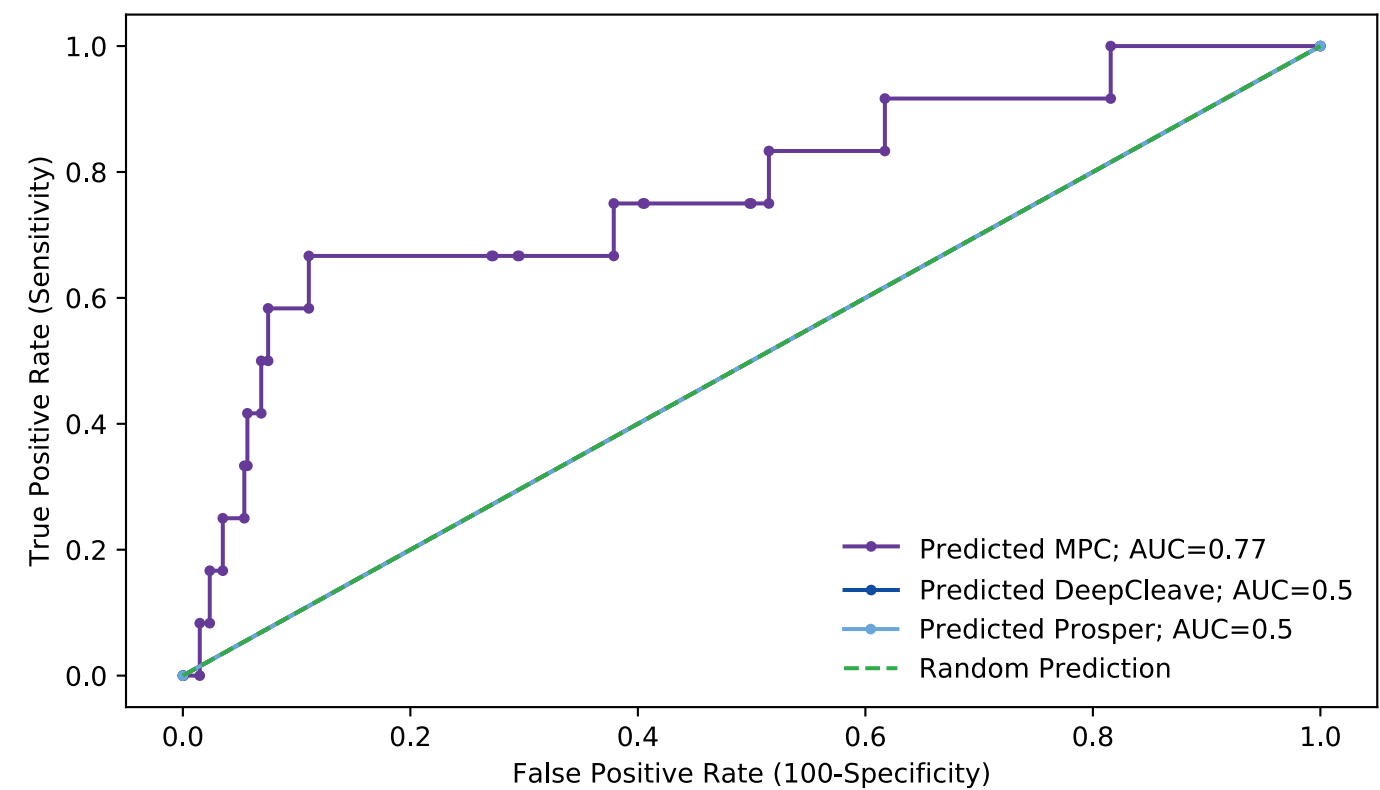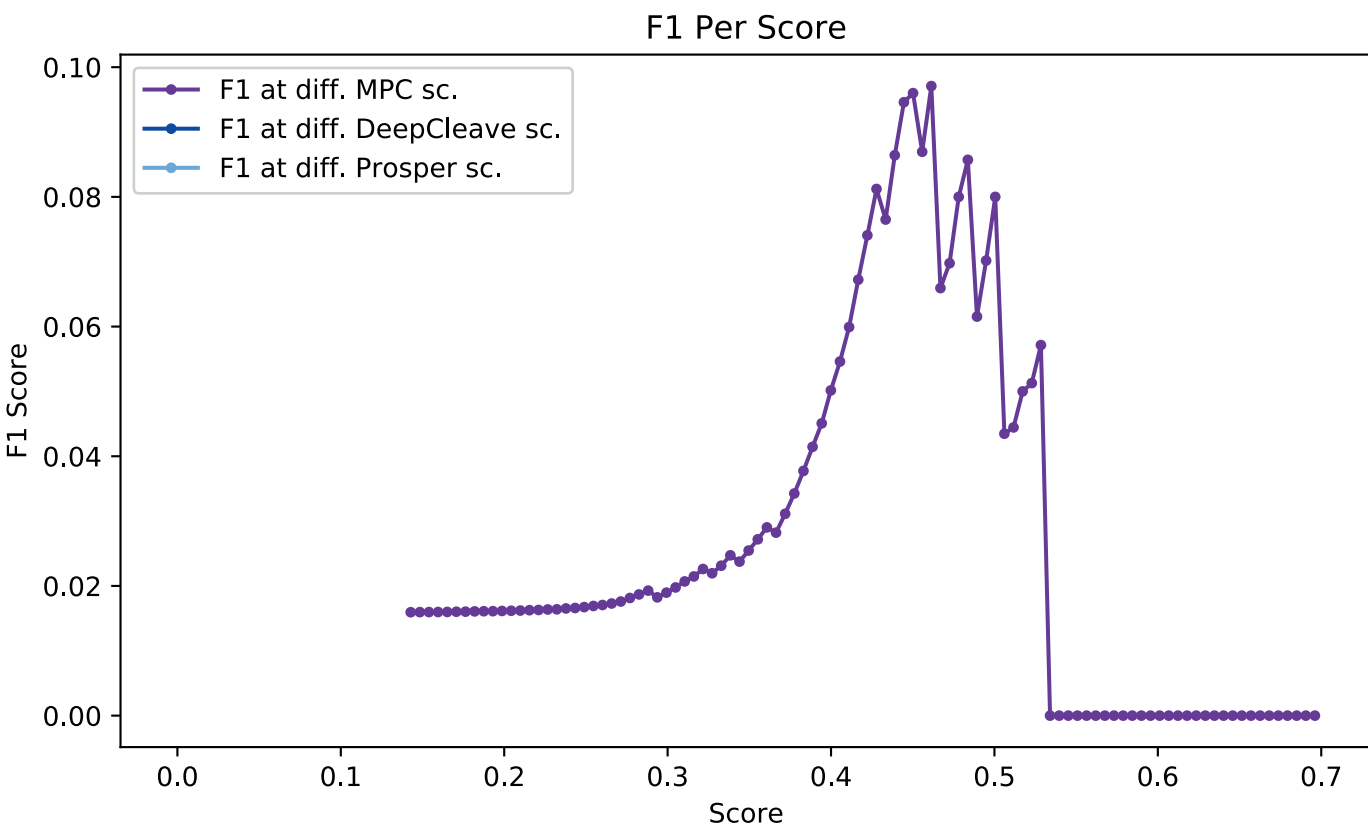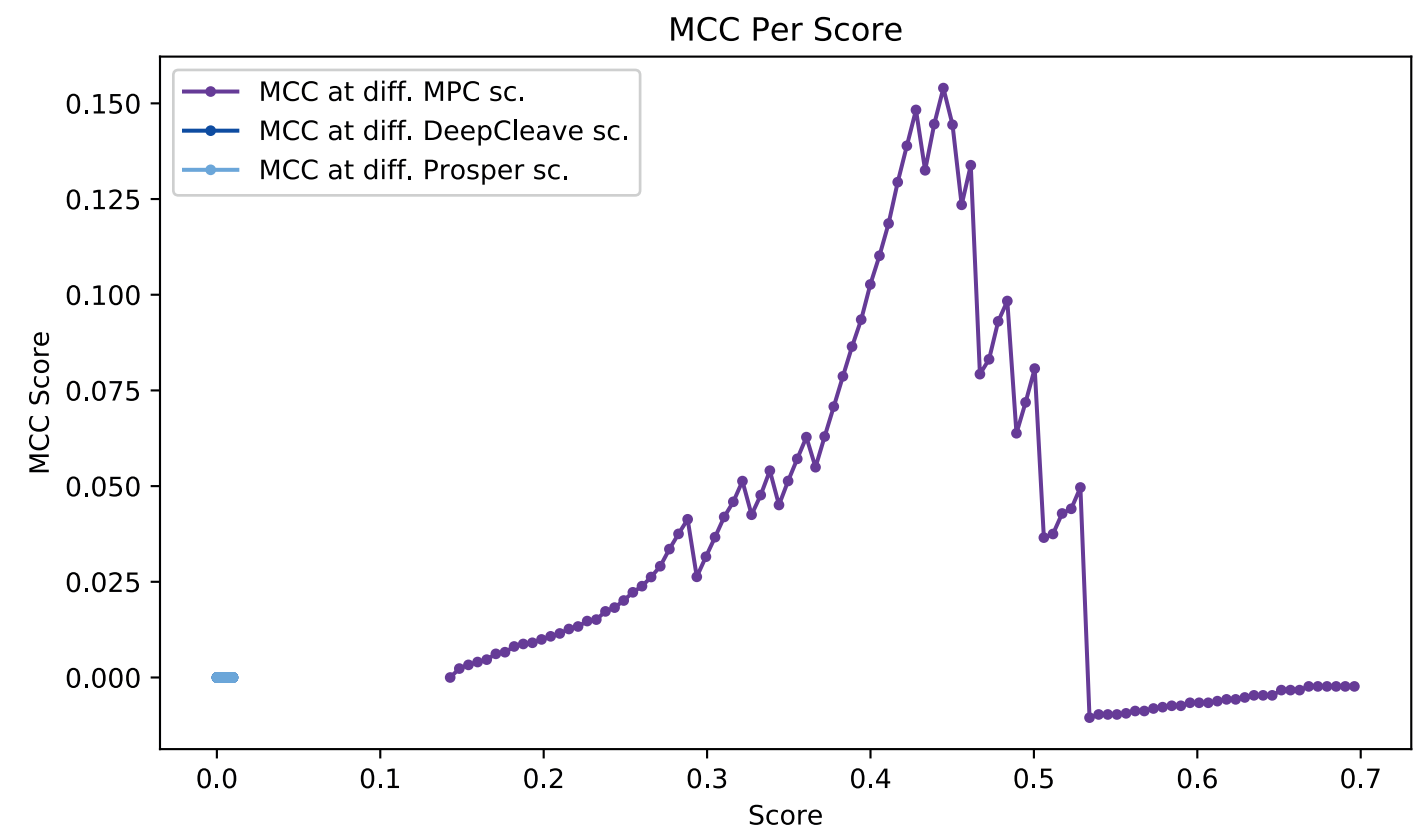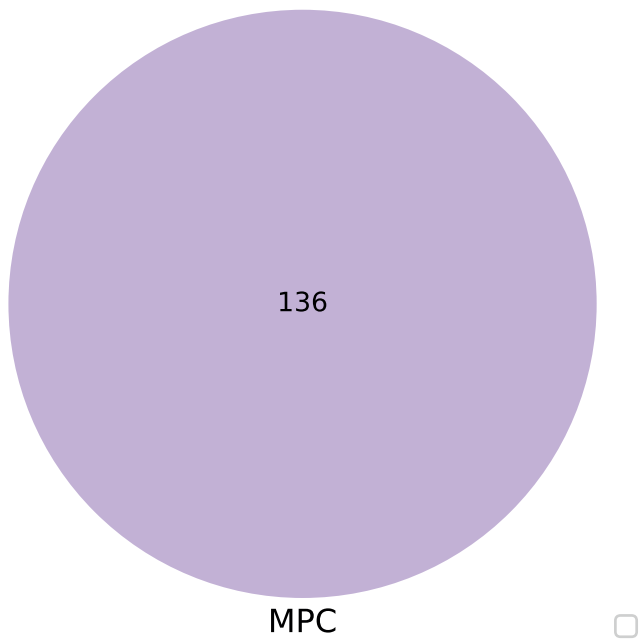

Supplement: s1 [file s1]
