# Supplementary material for: Predicting Proteolysis in Complex Proteomes Using Deep Learning
Source: MDPI journal article supplement (doi:10.3390/ijms22063071), 2021-03-17
Supplement: s1 [file s1]

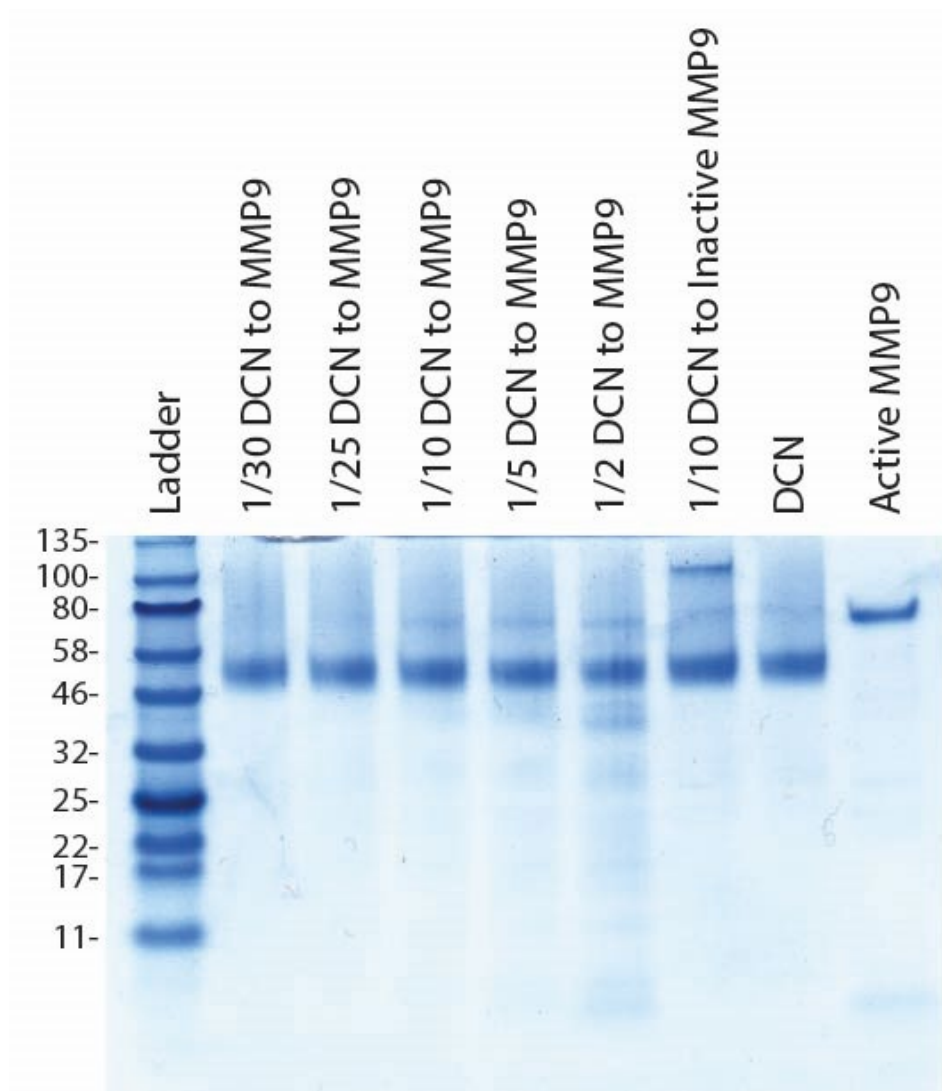

**Supporting Figure 1: Optimisation of protein to enzyme ratio.** MMP9 degraded DCN in a dose-dependent manner. At the highest DCN to MMP9 (1:2) multiple degradation products were readily detectable by SDS-PAGE. This relatively high enzyme concentration was used for subsequent experiments.

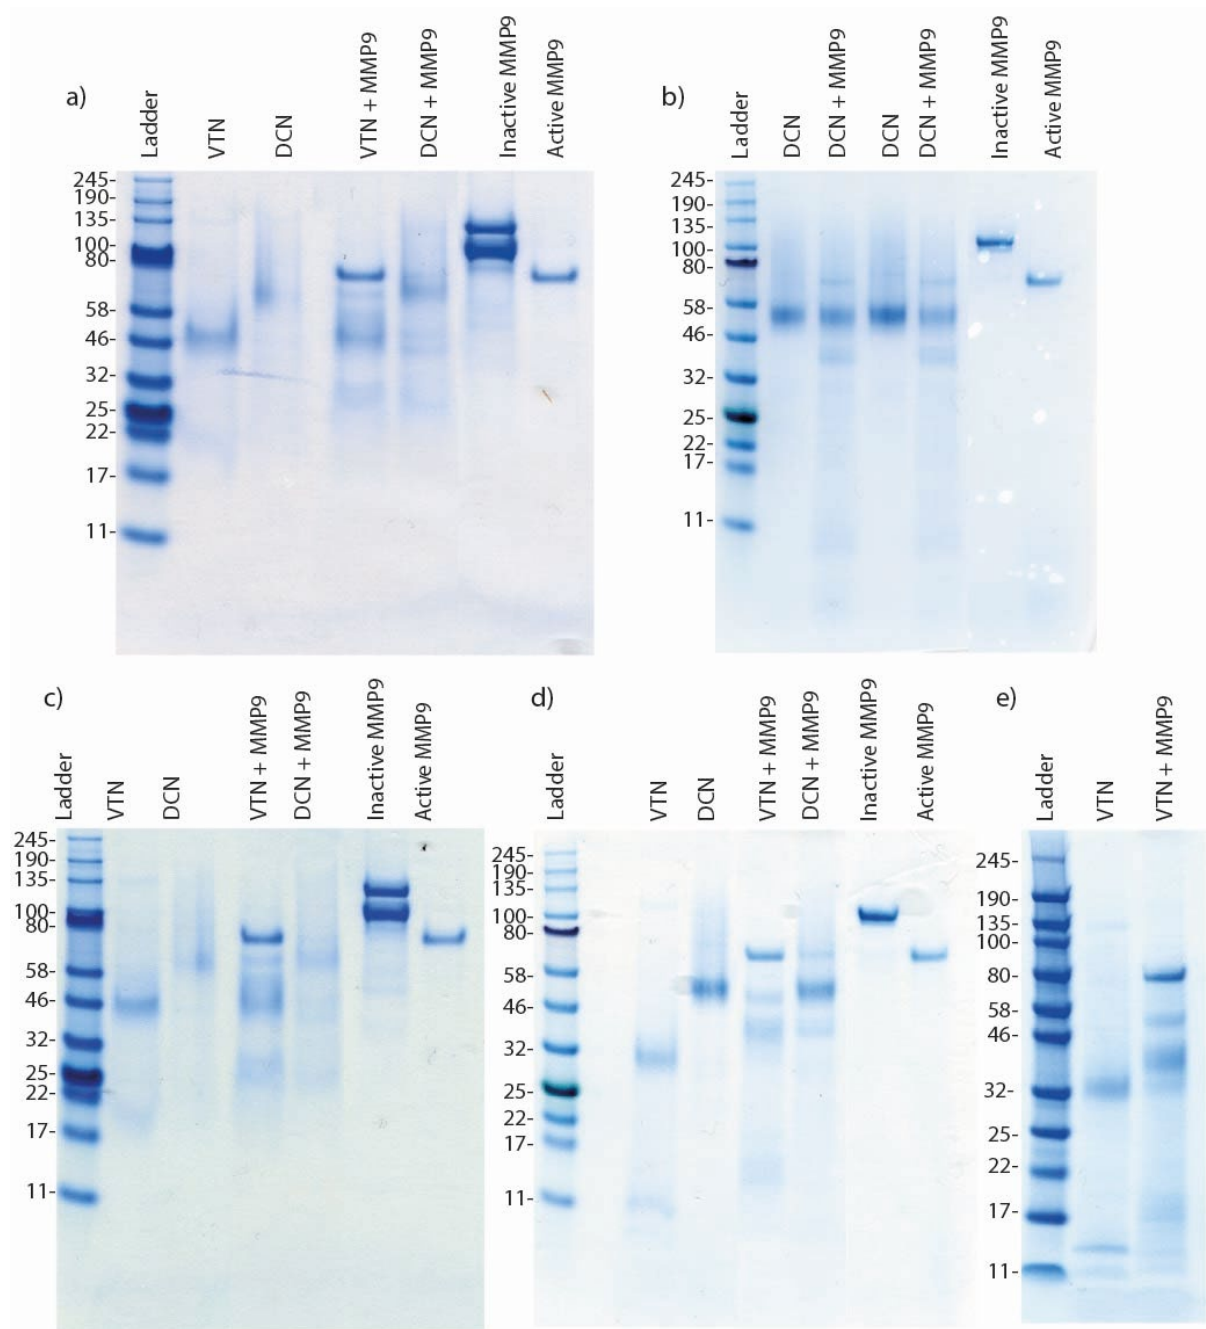

**Supporting Figure 2. Protein degradation experiments were performed in at least quadruplicate.** To confirm both the VTN and DCN degradation by MMP9 we ensured that both VTN and DCN experiments are performed at least 4 times. Five gels are showed here (a, b, c, d, e) which confirm the experimental consistency.
